# Supplementary material for: Has_circRNA_0122683 (circ-PRKCI) relieves ferroptosis of HPAEpiCs in sepsis-induced acute lung injury by sponging miR-382-5p
Source: PeerJ journal article supplement (doi:10.7717/peerj.19404), 2025-05-13
Supplement: MIQE_checklist.xlsx [file MIQE_checklist.xlsx]

## Sheet: Sheet1
ITEM TO CHECK	IMPORTANCE	CHECKLIST
EXPERIMENTAL DESIGN
Definition of experimental and control groups	E	Page 4-5, line 100-138
Number within each group	E	Page 4-5, line 100-138
Assay carried out by core lab or investigator's lab?	D
Acknowledgement of authors' contributions	D	Page 16, line 423-432
SAMPLE
Description	E	Page 4-5, line 113-116
Volume/mass of sample processed	D	Page 4-5, line 113-116
Microdissection or macrodissection	E	Page 4-5, line 113-116
Processing procedure	E	Page 4-5, line 113-116
If frozen - how and how quickly?	E	Page 4-5, line 113-116
If fixed - with what, how quickly?	E	Page 4-5, line 113-116
Sample storage conditions and duration (especially for FFPE samples)	E	Page 4-5, line 113-116
NUCLEIC ACID EXTRACTION
Procedure and/or instrumentation	E	Page 5-6, line 139-142
Name of kit and details of any modifications	E	Page 5-6, line 139-142
Source of additional reagents used	D
Details of DNase or RNAse treatment	E	Page 5-6, line 139-142
Contamination assessment (DNA or RNA)	E	Page 5-6, line 139-142
Nucleic acid quantification	E	Page 5-6, line 139-142
Instrument and method	E	Page 5-6, line 139-142
Purity (A260/A280)	D	Page 5-6, line 139-142
Yield	D
RNA integrity method/instrument	E	Page 5-6, line 139-142
RIN/RQI or Cq of 3' and 5' transcripts	E	Page 5-6, line 139-142
Electrophoresis traces	D
Inhibition testing (Cq dilutions, spike or other)	E	Page 5-6, line 139-142
REVERSE TRANSCRIPTION
Complete reaction conditions	E	Page 6, line 142-146
Amount of RNA and reaction volume	E	Page 6, line 142-146
Priming oligonucleotide (if using GSP) and concentration	E	Page 6, line 142-146
Reverse transcriptase and concentration	E	Page 6, line 142-146
Temperature and time	E	Page 6, line 142-146
Manufacturer of reagents and catalogue numbers	D	Page 6, line 142-146
Cqs with and without RT	D*
Storage conditions of cDNA	D
qPCR TARGET INFORMATION
If multiplex, efficiency and LOD of each assay.	E	Page 6, line 147-156
Sequence accession number	E	Page 6, line 147-156
Location of amplicon	D
Amplicon length	E	Page 6, line 147-156
In silico specificity screen (BLAST, etc)	E	Page 6, line 147-156
Pseudogenes, retropseudogenes or other homologs?	D
Sequence alignment	D
Secondary structure analysis of amplicon	D
Location of each primer by exon or intron (if applicable)	E	Page 6, line 147-156
What splice variants are targeted?	E	Page 6, line 147-156
qPCR OLIGONUCLEOTIDES
Primer sequences	E	Page 6, line 151-153
RTPrimerDB Identification Number	D
Probe sequences	D**
Location and identity of any modifications	E	Page 6, line 151-153
Manufacturer of oligonucleotides	D	Page 6, line 151-153
Purification method	D
qPCR PROTOCOL
Complete reaction conditions	E	Page 6, line 147-151
Reaction volume and amount of cDNA/DNA	E	Page 6, line 147-151
Primer, (probe), Mg++ and dNTP concentrations	E	Page 6, line 147-151
Polymerase identity and concentration	E	Page 6, line 147-151
Buffer/kit identity and manufacturer	E	Page 6, line 147-151
Exact chemical constitution of the buffer	D
Additives (SYBR Green I, DMSO, etc.)	E	Page 6, line 147-151
Manufacturer of plates/tubes and catalog number	D
Complete thermocycling parameters	E	Page 6, line 147-151
Reaction setup (manual/robotic)	D
Manufacturer of qPCR instrument	E	Page 6, line 147-151
qPCR VALIDATION
Evidence of optimisation (from gradients)	D
Specificity (gel, sequence, melt, or digest)	E	Page 6, line 153-156
For SYBR Green I, Cq of the NTC	E	Page 6, line 153-156
Standard curves with slope and y-intercept	E	Page 6, line 153-156
PCR efficiency calculated from slope	E	Page 6, line 153-156
Confidence interval for PCR efficiency or standard error	D
r2 of standard curve	E	Page 6, line 153-156
Linear dynamic range	E	Page 6, line 153-156
Cq variation at lower limit	E	Page 6, line 153-156
Confidence intervals throughout range	D
Evidence for limit of detection	E	Page 6, line 153-156
If multiplex, efficiency and LOD of each assay.	E	Page 6, line 153-156
DATA ANALYSIS
qPCR analysis program (source, version)	E	Page 6, line 153-156
Cq method determination	E	Page 6, line 153-156
Outlier identification and disposition	E	Page 6, line 153-156
Results of NTCs	E	Page 6, line 153-156
Justification of number and choice of reference genes	E	Page 6, line 153-156
Description of normalisation method	E	Page 6, line 153-156
Number and concordance of biological replicates	D	Page 9, line 238-239
Number and stage (RT or qPCR) of technical replicates	E	Page 6, line 153-156
Repeatability (intra-assay variation)	E	Page 9, line 238-239
Reproducibility (inter-assay variation, %CV)	D
Power analysis	D
Statistical methods for result significance	E	Page 6, line 153-156
Software (source, version)	E	Page 6, line 153-156
Cq or raw data submission using RDML	D	Page 6, line 153-156
Table 1. MIQE checklist for authors, reviewers and editors. All essential information (E) must be submitted with the manuscript. Desirable
information (D) should be submitted if available. If using primers obtained from RTPrimerDB, information on qPCR target, oligonucleotides,
protocols and validation is available from that source.
*: Assessing the absence of DNA using a no RT assay is essential when first extracting RNA. Once the sample has been validated as
RDNA-free, inclusion of a no-RT control is desirable, but no longer essential.
**: Disclosure of the probe sequence is highly desirable and strongly encouraged. However, since not all commercial pre-designed assay
vendors provide this information, it cannot be an essential requirement. Use of such assays is advised against.
