# Supplementary material for: Has_circRNA_0122683 (circ-PRKCI) relieves ferroptosis of HPAEpiCs in sepsis-induced acute lung injury by sponging miR-382-5p
Source: PeerJ journal article supplement (doi:10.7717/peerj.19404), 2025-05-13
Supplement: Raw_data.zip [file Figure 1A Data.xlsx]

## Sheet: circ-PRKCI
										Detection index	group	Mean internal parameter	Average target gene	ΔCt	—ΔΔCt	Relative expression level	SD
Gene name	group		GAPDH	Target gene	ΔCt	—ΔΔCt	Relative expression level			circ-PRKCI	healthy individuals	18.3836	25.1192	6.7356	0	1	0.162287
circ-PRKCI	septic ALI	1	18.114	25.5612	7.44723	-0.711622	0.610633				septic ALI	18.2709	25.6967	7.42583	-0.690224	0.619758	0.0577593
		2	18.2879	25.6202	7.33233	-0.596725	0.661253				septic non-ALI	18.4038	25.2173	6.81354	-0.0779346	0.947413	0.0984233
		3	18.3124	25.7445	7.43213	-0.696522	0.617058
		4	18.3374	25.9359	7.59843	-0.86283	0.549873
		5	18.3831	25.7196	7.33648	-0.600877	0.659353
		6	18.3057	25.8972	7.59146	-0.855856	0.552537
		7	18.2777	25.574	7.29637	-0.560765	0.677942
		8	18.2765	25.615	7.33858	-0.602974	0.658395
		9	18.1522	25.6084	7.45625	-0.720643	0.606827
		10	17.9163	25.5275	7.6112	-0.875594	0.545029
		11	18.0485	25.4739	7.42539	-0.689791	0.619944
		12	18.0072	25.5082	7.50105	-0.765451	0.58827
		13	18.4962	25.9985	7.50229	-0.766691	0.587764
		14	18.5438	25.9048	7.36098	-0.625377	0.648251
		15	18.343	25.7932	7.45023	-0.714625	0.609364
		16	18.4056	25.867	7.46142	-0.725814	0.604656
		17	18.2932	25.7566	7.46337	-0.727764	0.603839
		18	18.2774	25.8896	7.61223	-0.876622	0.544641
		19	18.3078	25.7521	7.44424	-0.708633	0.611899
		20	18.3178	25.6893	7.37151	-0.635909	0.643535
		21	18.2894	25.526	7.23658	-0.500981	0.706626
		22	18.1677	25.6424	7.47465	-0.739042	0.599137
		23	18.0745	25.4887	7.41417	-0.678564	0.624787
		24	18.3006	25.7306	7.43002	-0.694412	0.617961
		25	18.3832	25.3608	6.97766	-0.242052	0.845542
		26	18.2159	25.7512	7.53536	-0.799753	0.574447
		27	18.4254	25.7733	7.34796	-0.612355	0.654128
		28	18.4563	25.8048	7.3485	-0.612895	0.653883
		29	18.2811	25.6578	7.37673	-0.641122	0.641214
		30	18.2496	25.7153	7.46568	-0.730079	0.602871
		31	18.1511	25.7113	7.56021	-0.824608	0.564636
	septic non-ALI	1	18.5247	25.3312	6.80644	-0.0708406	0.952083
		2	18.49	25.317	6.82694	-0.091336	0.938653
		3	18.4873	25.3795	6.89227	-0.156662	0.897098
		4	18.5791	25.3409	6.76179	-0.0261859	0.982013
		5	18.5023	25.2515	6.74922	-0.0136132	0.990608
		6	18.446	25.4217	6.97577	-0.240164	0.846649
		7	18.3495	25.3232	6.97362	-0.23802	0.847908
		8	18.3732	25.182	6.80874	-0.0731334	0.950571
		9	18.3648	25.1437	6.77889	-0.0432856	0.970442
		10	18.595	25.1319	6.53694	0.198661	1.14763
		11	18.1448	25.102	6.95722	-0.221616	0.857604
		12	18.1898	25.1327	6.94294	-0.207331	0.866138
		13	18.6093	25.3389	6.72963	0.00597461	1.00415
		14	18.5765	25.4985	6.92208	-0.186481	0.878747
		15	18.6172	25.3855	6.76833	-0.0327288	0.97757
		16	18.5483	25.441	6.89268	-0.157079	0.896839
		17	18.4894	25.3441	6.85471	-0.119103	0.92076
		18	18.5148	25.4383	6.92354	-0.187936	0.877861
		19	18.5172	25.2499	6.73267	0.00292896	1.00203
		20	18.4866	25.3305	6.84384	-0.108232	0.927724
		21	18.2845	25.2353	6.9508	-0.215199	0.861427
		22	18.36	25.1897	6.82971	-0.0941098	0.93685
		23	18.3491	25.0994	6.7503	-0.0146948	0.989866
		24	18.4229	25.2655	6.84259	-0.106982	0.928529
		25	18.3892	24.9669	6.57773	0.157875	1.11564
		26	18.441	25.2427	6.80169	-0.0660814	0.955229
		27	18.3988	25.1779	6.77914	-0.0435358	0.970274
		28	18.4493	25.2386	6.78921	-0.0536013	0.963528
		29	18.3364	25.2114	6.87501	-0.139407	0.907892
		30	18.3433	25.2815	6.93819	-0.202588	0.86899
		31	18.2869	25.2007	6.91382	-0.17822	0.883793
		32	18.3154	25.2192	6.90388	-0.168274	0.889907
		33	18.2911	25.1635	6.87235	-0.136745	0.909569
		34	18.3571	25.0929	6.73573	-0.000124991	0.999913
		35	18.2425	25.1247	6.88219	-0.146588	0.903384
		36	18.3155	25.0678	6.75239	-0.0167909	0.988429
		37	18.5278	25.3188	6.79106	-0.055452	0.962293
		38	18.5879	25.0911	6.50318	0.232429	1.17481
		39	18.5761	24.876	6.29996	0.435646	1.35252
		40	18.4549	25.0972	6.64234	0.0932666	1.06678
		41	18.4036	25.0677	6.66409	0.0715162	1.05082
		42	18.3765	25.2261	6.84962	-0.114015	0.924013
		43	18.4039	25.2341	6.83014	-0.0945316	0.936576
		44	18.3105	25.0402	6.72965	0.00595361	1.00414
		45	18.2664	25.0919	6.82546	-0.08986	0.939614
		46	18.2592	25.0379	6.77865	-0.0430447	0.970604
		47	18.2737	25.2198	6.94613	-0.210527	0.864222
		48	18.0181	25.1799	7.1618	-0.426192	0.744223
		49	18.3366	25.3049	6.96834	-0.232733	0.851021
	healthy individuals	1	18.111	24.889	6.77803	-0.0424255	0.971021
		2	18.1133	25.0123	6.89902	-0.163418	0.892907
		3	18.2991	24.839	6.53992	0.195685	1.14527
		4	18.0824	24.8494	6.76698	-0.0313762	0.978486
		5	18.1323	24.5523	6.42004	0.315561	1.2445
		6	18.3936	25.0876	6.69403	0.0415714	1.02923
		7	18.3863	24.9131	6.52683	0.208771	1.1557
		8	18.4063	24.6406	6.23432	0.501287	1.41548
		9	18.3822	24.5867	6.20448	0.531125	1.44506
		10	18.3009	24.5045	6.20357	0.532031	1.44596
		11	18.2886	24.9711	6.6825	0.0531021	1.03749
		12	18.2137	25.2126	6.99884	-0.263236	0.833217
		13	18.1588	24.9417	6.78286	-0.0472561	0.967775
		14	18.1431	24.5508	6.4077	0.3279	1.25518
		15	18.1537	24.7999	6.64624	0.0893629	1.0639
		16	18.157	25.2922	7.13524	-0.399633	0.758051
		17	17.9165	24.2134	6.29694	0.438665	1.35535
		18	18.2922	25.4395	7.14735	-0.411744	0.751714
		19	18.5562	25.4078	6.85158	-0.115972	0.922761
		20	18.5249	25.4684	6.94349	-0.207884	0.865806
		21	18.5749	25.42	6.84513	-0.109528	0.926892
		22	18.6027	25.3691	6.76643	-0.0308214	0.978863
		23	18.5819	25.3293	6.74744	-0.0118346	0.99183
		24	18.458	25.2764	6.81837	-0.0827667	0.944245
		25	18.4577	25.2278	6.77011	-0.034504	0.976367
		26	18.4098	25.1768	6.76704	-0.0314389	0.978444
		27	18.3808	25.1916	6.81079	-0.0751861	0.94922
		28	18.4269	25.1497	6.7228	0.0128008	1.00891
		29	18.0787	25.0638	6.98511	-0.249509	0.841183
		30	18.7207	25.2176	6.49696	0.238645	1.17988
		31	18.6709	25.2504	6.57947	0.156133	1.1143
		32	18.6248	25.2997	6.6749	0.0607047	1.04298
		33	18.6226	25.2732	6.65068	0.0849203	1.06063
		34	18.5235	25.2167	6.69318	0.0424203	1.02984
		35	18.5939	25.3913	6.79741	-0.0618111	0.958061
		36	18.4864	25.1981	6.71167	0.0239359	1.01673
		37	18.4923	25.1442	6.65185	0.0837505	1.05977
		38	18.3636	25.1422	6.77855	-0.0429436	0.970672
		39	18.4312	25.0449	6.61372	0.121886	1.08816
		40	18.3776	25.0153	6.63764	0.097966	1.07026
		41	18.5073	25.0011	6.49383	0.241776	1.18245
		42	18.4614	25.5272	7.06577	-0.330161	0.795447
		43	18.4455	25.4502	7.00464	-0.269032	0.829876
		44	18.5156	25.3861	6.87049	-0.134889	0.91074
		45	18.5706	25.4167	6.8461	-0.110492	0.926272
		46	18.413	25.3795	6.96653	-0.230923	0.852089
		47	18.4317	25.4025	6.97083	-0.235224	0.849553
		48	18.3128	25.2926	6.97986	-0.244255	0.844252
		49	18.3867	25.3061	6.91942	-0.183812	0.880374
		50	18.3824	25.1931	6.8107	-0.075098	0.949278
		51	18.3759	25.1413	6.76536	-0.0297571	0.979585
		52	18.2776	25.1286	6.85108	-0.115471	0.923081
		53	18.3616	25.1248	6.7632	-0.0275968	0.981053

## Sheet: Sheet1
circ-PRKCI expression
septic ALI (A group)	septic non-ALI (B group)	healthy individuals (C group)
0.611	0.952	0.971
0.661	0.939	0.893
0.617	0.897	1.145		One-way analysis of variance
0.55	0.982	0.978		P value	< 0.0001
0.659	0.991	1.244		P value summary	***
0.553	0.847	1.029		Are means signif. different? (P < 0.05)	Yes
0.678	0.848	1.156		Number of groups	3
0.658	0.951	1.415		F	107.1
0.607	0.97	1.445		R squared	0.6223
0.545	1.148	1.446
0.62	0.858	1.037		Tukey's Multiple Comparison Test	Mean Diff.	q	Significant? P < 0.05?	Summary	95% CI of diff
0.588	0.866	0.833		Column A vs Column B	-0.3299	16.67	Yes	***	-0.3963 to -0.2635
0.588	1.004	0.968		Column A vs Column C	-0.3896	19.97	Yes	***	-0.4550 to -0.3241
0.648	0.879	1.255		Column B vs Column C	-0.05965	3.49	Yes	*	-0.1170 to -0.002287
0.609	0.978	1.064
0.605	0.897	0.758
0.604	0.921	1.355
0.545	0.878	0.752
0.612	1.002	0.923
0.644	0.928	0.866
0.707	0.861	0.927
0.599	0.937	0.979
0.625	0.99	0.992
0.618	0.929	0.944
0.846	1.116	0.976
0.574	0.955	0.978
0.654	0.97	0.949
0.654	0.964	1.009
0.641	0.908	0.841
0.603	0.869	1.18
0.565	0.884	1.114
	0.89	1.043
	0.91	1.061
	1	1.03
	0.903	0.958
	0.988	1.017
	0.962	1.06
	1.175	0.971
	1.353	1.088
	1.067	1.07
	1.051	1.182
	0.924	0.795
	0.937	0.83
	1.004	0.911
	0.94	0.926
	0.971	0.852
	0.864	0.85
	0.744	0.844
	0.851	0.88
		0.949
		0.98
		0.923
		0.981
