# Supplementary material for: Has_circRNA_0122683 (circ-PRKCI) relieves ferroptosis of HPAEpiCs in sepsis-induced acute lung injury by sponging miR-382-5p
Source: PeerJ journal article supplement (doi:10.7717/peerj.19404), 2025-05-13
Supplement: Raw_data.zip [file Figure 1B Data.xlsx]

## Sheet: circ-PRKCI
											Mean internal parameter	Average target gene	ΔCt	—ΔΔCt	Relative expression level	SD
Gene name	group		GAPDH	Target gene	ΔCt	—ΔΔCt	Relative expression level			3h-untreated	18.0352	24.9377	6.90252	0	1	0.152124
circ-PRKCI	3h-untreated	1	17.8873	24.9362	7.04883	-0.146311	0.903558			3h-LPS treated	17.6921	24.5988	6.90678	-0.00426416	0.997049	0.16492
			18.0543	24.9667	6.9124	-0.00988327	0.993173			6h-untreated	17.6128	24.112	6.49924	0.403278	1.32251	0.0927514
			18.1038	24.9494	6.84563	0.0568874	1.04022			6h-LPS treated	17.7835	24.7461	6.96263	-0.0601185	0.959185	0.119717
		2	18.1044	24.8322	6.72786	0.17466	1.1287			12h-untreated	17.857	24.6342	6.77717	0.125343	1.09077	0.172707
			18.1544	24.7952	6.6408	0.26172	1.19891			12h-LPS treated	18.0001	25.5103	7.51017	-0.607659	0.656261	0.0545283
			18.1354	24.65	6.51463	0.387888	1.30848			24h-untreated	17.8588	24.8462	6.98736	-0.08484	0.942889	0.121736
		3	17.9619	24.9475	6.98555	-0.0830344	0.94407			24h-LPS treated	17.6562	26.3812	8.72504	-1.82253	0.282726	0.0881609
			17.9879	25.084	7.09614	-0.193625	0.874406
			17.927	25.2778	7.35082	-0.448302	0.732905
	3h-LPS treated	1	18.1113	24.689	6.57762	0.324893	1.25257
			17.76	25.0196	7.25965	-0.357131	0.780716
			17.9098	24.6964	6.78662	0.115898	1.08365
		2	17.6361	24.4612	6.82518	0.0773397	1.05507
			17.5123	24.6254	7.11313	-0.210619	0.864166
			17.629	24.2956	6.66665	0.235865	1.17761
		3	17.6429	24.6934	7.05049	-0.14797	0.902519
			17.3633	24.5033	7.13998	-0.237464	0.848235
			17.664	24.4057	6.7417	0.160812	1.11792
	6h-untreated	1	17.6963	24.1344	6.43801	0.464504	1.37984
			17.6316	24.0812	6.44959	0.452929	1.36882
			17.5471	24.0913	6.54427	0.358249	1.28187
		2	17.7684	24.1304	6.36202	0.540496	1.45447
			17.6747	24.0474	6.37274	0.529776	1.44371
			17.5543	24.087	6.53264	0.369874	1.29224
		3	17.5735	24.1951	6.62161	0.280901	1.21495
			17.5445	24.192	6.64754	0.254976	1.19332
			17.5244	24.0491	6.52472	0.377793	1.29935
	6h-LPS treated	1	18.0126	24.7611	6.74848	0.154032	1.11268
			17.9325	24.823	6.89052	0.0119946	1.00835
			17.6408	24.6761	7.03526	-0.132743	0.912095
		2	17.8502	24.6554	6.80523	0.0972822	1.06976
			17.919	24.6625	6.74347	0.159049	1.11655
			17.7432	24.7016	6.95843	-0.0559099	0.961988
		3	17.7037	24.9013	7.19762	-0.295102	0.815015
			17.623	24.8454	7.22243	-0.31991	0.80112
			17.6261	24.6884	7.06228	-0.15976	0.895174
	12h-untreated	1	17.9105	24.7117	6.80119	0.101326	1.07276
			17.7885	24.7472	6.95873	-0.0562102	0.961787
			17.9039	24.606	6.70217	0.200341	1.14897
		2	18.0475	24.5971	6.54962	0.352901	1.27713
			17.9673	24.4729	6.50564	0.396874	1.31665
			17.9464	24.4354	6.48899	0.413525	1.33194
		3	17.7169	24.7996	7.08264	-0.180129	0.882624
			17.741	24.7305	6.98952	-0.0870007	0.941478
			17.691	24.6071	6.91606	-0.0135421	0.990657
	12h-LPS treated	1	18.0707	25.5208	7.45007	-0.547554	0.684179
			17.9679	25.5205	7.55258	-0.650064	0.637252
			17.8773	25.591	7.71373	-0.811219	0.5699
		2	18.0943	25.5132	7.4189	-0.516384	0.699122
			18.0416	25.402	7.36037	-0.457851	0.72807
			18.1395	25.4986	7.35915	-0.456638	0.728682
		3	18.1188	25.6731	7.55422	-0.651702	0.636529
			17.9104	25.4935	7.58319	-0.680672	0.623875
			17.7802	25.3796	7.59936	-0.696848	0.616918
	24h-untreated	1	17.7116	24.9482	7.23667	-0.334151	0.793251
			17.9775	24.9155	6.93792	-0.035407	0.975756
			18.0045	24.764	6.75949	0.14303	1.10422
		2	18.0286	24.7531	6.72444	0.178073	1.13137
			17.8768	24.7187	6.84192	0.0605951	1.0429
			17.7507	24.7569	7.00623	-0.103716	0.930633
		3	17.7655	24.9203	7.15478	-0.252267	0.839576
			17.7373	24.8863	7.14897	-0.24645	0.842968
			17.8769	24.9527	7.07578	-0.173268	0.886832
	24h-LPS treated	1	16.1435	26.2932	10.1497	-3.24715	0.10532
			18.0108	26.3887	8.37793	-1.47541	0.359631
			18.1859	26.4392	8.25324	-1.35072	0.392095
		2	17.9101	26.2419	8.33172	-1.4292	0.371337
			17.8502	26.2701	8.41986	-1.51734	0.349329
			17.6972	26.328	8.63084	-1.72832	0.301802
		3	17.7703	26.5537	8.78343	-1.88092	0.271511
			17.7409	26.3457	8.60481	-1.7023	0.307296
			17.5965	26.5704	8.97389	-2.07137	0.237933

## Sheet: Sheet1
circ-PRKCI expression	untreated (A group)									LPS treated (B group)
3h (Row 1)	0.904	0.993	1.04	1.129	1.199	1.308	0.944	0.874	0.733	1.253	0.781	1.084	1.055	0.864	1.178	0.903	0.848	1.118
6h (Row 2)	1.38	1.369	1.282	1.454	1.444	1.292	1.215	1.193	1.299	1.113	1.008	0.912	1.07	1.117	0.962	0.815	0.801	0.895
12h (Row 3)	1.073	0.962	1.149	1.277	1.317	1.332	0.883	0.941	0.991	0.684	0.637	0.57	0.699	0.728	0.729	0.637	0.624	0.617
24h (Row 4)	0.793	0.976	1.104	1.131	1.043	0.931	0.84	0.843	0.887	0.105	0.36	0.392	0.371	0.349	0.302	0.272	0.307	0.238
	Two-way RM ANOVA	Matching by cols
	Source of Variation	% of total variation	P value
	Interaction	13.74	< 0.0001
	Time	37.35	< 0.0001
	Column Factor	33.56	< 0.0001
	Subjects (matching)	7.973	0.0008
	Source of Variation	P value summary	Significant?
	Interaction	***	Yes
	Time	***	Yes
	Column Factor	***	Yes
	Subjects (matching)	***	Yes
	Source of Variation	Df	Sum-of-squares	Mean square	F
	Interaction	3	0.9796	0.3265	29.76
	Time	3	2.664	0.8879	80.93
	Column Factor	1	2.393	2.393	67.34
	Subjects (matching)	16	0.5686	0.03554	3.239
	Residual	48	0.5266	0.01097
	Number of missing values	0
	Bonferroni posttests
	Column A vs Column B
	Column Factor	Column A	Column B	Difference	95% CI of diff.
	Row 1	1.014	1.009	-0.004444	-0.1629 to 0.1541
	Row 2	1.325	0.9659	-0.3594	-0.5179 to -0.2009
	Row 3	1.103	0.6583	-0.4444	-0.6029 to -0.2859
	Row 4	0.9498	0.2996	-0.6502	-0.8087 to -0.4917
	Column Factor	Difference	t	P value	Summary
	Row 1	-0.004444	0.07207	P > 0.05	ns
	Row 2	-0.3594	5.829	P<0.001	***
	Row 3	-0.4444	7.207	P<0.001	***
	Row 4	-0.6502	10.54	P<0.001	***
