# Supplementary material for: Has_circRNA_0122683 (circ-PRKCI) relieves ferroptosis of HPAEpiCs in sepsis-induced acute lung injury by sponging miR-382-5p
Source: PeerJ journal article supplement (doi:10.7717/peerj.19404), 2025-05-13
Supplement: Raw_data.zip [file Figure 1C Data.xlsx]

## Sheet: circ-PRKCI---PRKCI
												Mean internal parameter	Average target gene	ΔCt	—ΔΔCt	Relative expression level	SD
Gene name	group		GAPDH	Target gene	ΔCt	—ΔΔCt	Relative expression level			circ-PRKCI	control	17.8743	24.541	6.66664	0	1	0.153401
circ-PRKCI	control	1	17.8581	24.7345	6.87641	-0.209771	0.864674				RNase R	17.7243	24.5715	6.84724	-0.180605	0.882333	0.140244
			18.098	24.6581	6.56007	0.10657	1.07667			PRKCI	control	17.5917	24.3103	6.71862	0	1	0.0997459
			17.9504	24.553	6.60266	0.0639718	1.04534				RNase R	17.571	25.5535	7.98241	-1.26379	0.416449	0.0406625
		2	17.9366	24.457	6.52041	0.146226	1.10667
			17.9636	24.4095	6.44593	0.220707	1.1653
			17.9662	24.3725	6.40638	0.260255	1.19769
		3	17.6785	24.6255	6.94698	-0.280342	0.823396
			17.7021	24.6475	6.94532	-0.278683	0.824343
			17.7157	24.4113	6.69557	-0.0289333	0.980145
	RNase R	1	17.7716	24.5411	6.76944	-0.102806	0.93122
			17.7396	24.8744	7.13477	-0.468134	0.722899
			17.4685	24.3748	6.90629	-0.239653	0.846949
		2	17.8692	24.7767	6.90752	-0.240882	0.846228
			17.9602	24.7613	6.80109	-0.134456	0.911013
			17.8214	24.7437	6.92226	-0.255621	0.837626
		3	17.6684	24.2557	6.58725	0.0793856	1.05657
			17.6671	24.7953	7.12821	-0.461572	0.726195
			17.5522	24.0206	6.46835	0.19829	1.14734
PRKCI	control	1	17.5188	24.4182	6.89936	-0.180732	0.882255
			17.8347	24.4107	6.57604	0.142578	1.10388
			17.3747	24.3091	6.93444	-0.215817	0.861059
		2	17.7971	24.3101	6.51302	0.205603	1.15317
			17.6148	24.1978	6.58309	0.135535	1.0985
			17.5206	24.2271	6.70654	0.0120833	1.00841
		3	17.5439	24.3281	6.78424	-0.0656198	0.955535
			17.5621	24.3165	6.75435	-0.0357281	0.975539
			17.5584	24.2749	6.71653	0.00209674	1.00145
	RNase R	1	17.6633	25.5894	7.92609	-1.20747	0.433029
			17.6581	25.5624	7.90429	-1.18566	0.439622
			17.5384	25.7016	8.16316	-1.44454	0.36741
		2	17.6174	25.4767	7.85936	-1.14074	0.453526
			17.5177	25.5036	7.98589	-1.26727	0.415446
			17.3723	25.5516	8.17932	-1.4607	0.363317
		3	17.5622	25.6415	8.07927	-1.36065	0.389408
			17.5372	25.5275	7.99032	-1.2717	0.414172
			17.6728	25.4268	7.75401	-1.03538	0.487886

## Sheet: Sheet1
circ-PRKCI expression											PRKCI expression
control (A group)	0.865	1.077	1.045	1.107	1.165	1.198	0.823	0.824	0.98		control (A group)	0.882	1.104	0.861	1.153	1.099	1.008	0.956	0.976	1.001
RNase R (B group)	0.931	0.723	0.847	0.846	0.911	0.838	1.057	0.726	1.147		RNase R (B group)	0.433	0.44	0.367	0.454	0.415	0.363	0.389	0.414	0.488
	Table Analyzed	Data 1										Table Analyzed	Data 1
	Column A											Column A
	vs	vs										vs	vs
	Column B											Column B
	Unpaired t test											Unpaired t test
	P value	0.0985										P value	< 0.0001
	P value summary	ns										P value summary	***
	Are means signif. different? (P < 0.05)	No										Are means signif. different? (P < 0.05)	Yes
	One- or two-tailed P value?	Two-tailed										One- or two-tailed P value?	Two-tailed
	t, df	t=1.754 df=16										t, df	t=16.31 df=16
