# Supplementary material for: Has_circRNA_0122683 (circ-PRKCI) relieves ferroptosis of HPAEpiCs in sepsis-induced acute lung injury by sponging miR-382-5p
Source: PeerJ journal article supplement (doi:10.7717/peerj.19404), 2025-05-13
Supplement: Raw_data.zip [file Figure 1D Data.xlsx]

## Sheet: circ-PRKCI---PRKCI
										Detection index	group	Mean internal parameter	Average target gene	ΔCt	—ΔΔCt	Relative expression level	SD
Gene name	group		GAPDH	Target gene	ΔCt	—ΔΔCt	Relative expression level			circ-PRKCI	0h	17.7794	24.6211	6.84168	0	1	0.144039
circ-PRKCI	0h	1	17.7868	24.668	6.8812	-0.0395189	0.972979				4h	17.6639	24.728	7.06409	-0.22241	0.857133	0.0763026
			18.022	24.6924	6.67038	0.171301	1.12607				8h	17.6247	24.3103	6.68562	0.15606	1.11424	0.257731
			17.739	24.6175	6.87851	-0.0368279	0.974796				12h	17.4391	24.8705	7.43141	-0.589735	0.664465	0.0884535
		2	17.9204	24.749	6.82861	0.0130663	1.0091				24h	17.5471	24.8396	7.29246	-0.450783	0.731646	0.107349
			17.8058	24.462	6.65622	0.185455	1.13718			PRKCI	0h	17.843	24.5665	6.72357	0	1	0.149066
			17.8363	24.4209	6.58465	0.257027	1.19501				4h	17.8104	24.9134	7.10298	-0.379404	0.768755	0.0857969
		3	17.6144	24.658	7.04362	-0.201943	0.869379				8h	17.5898	24.98	7.39022	-0.666642	0.629971	0.0394661
			17.6195	24.844	7.22447	-0.382787	0.766954				12h	17.6602	25.6102	7.95	-1.22642	0.427376	0.12527
			17.6709	24.4784	6.80745	0.0342282	1.02401				24h	17.6231	25.2542	7.63114	-0.907562	0.533085	0.088975
	4h	1	17.7676	24.7928	7.02529	-0.18361	0.880497
			17.7042	24.679	6.97483	-0.133146	0.911841
			17.6659	24.722	7.05614	-0.214463	0.861867
		2	17.8391	24.9004	7.06129	-0.219613	0.858796
			17.7557	24.5833	6.8276	0.0140757	1.0098
			17.6326	24.6748	7.04217	-0.200495	0.870252
		3	17.5885	24.7622	7.17364	-0.33196	0.794456
			17.5556	24.6947	7.13912	-0.297442	0.813694
			17.4661	24.7429	7.27671	-0.435033	0.739677
	8h	1	17.4361	24.4143	6.97817	-0.136495	0.909726
			17.5757	24.2955	6.71982	0.121863	1.08814
			17.5304	24.2647	6.73432	0.10736	1.07725
		2	17.6079	24.3401	6.73222	0.109463	1.07883
			17.5747	24.2283	6.65361	0.188071	1.13924
			17.4807	24.2792	6.79858	0.0431004	1.03033
		3	18.3383	24.3325	5.99422	0.847458	1.79933
			17.5217	24.3579	6.83614	0.00554414	1.00385
			17.5568	24.2803	6.7235	0.118178	1.08536
	12h	1	17.1306	24.7922	7.66156	-0.819885	0.566487
			17.5168	24.959	7.44213	-0.600453	0.659547
			17.5591	25.0428	7.48374	-0.642056	0.640799
		2	17.5758	24.7911	7.21537	-0.373686	0.771808
			17.4709	24.8397	7.36875	-0.527073	0.693961
			17.3466	24.4316	7.08499	-0.243311	0.844804
		3	17.5258	25.0997	7.57392	-0.732245	0.601966
			17.3375	24.8897	7.55219	-0.71051	0.611104
			17.4883	24.9884	7.50008	-0.6584	0.633581
	24h	1	17.4962	24.5741	7.07799	-0.236308	0.848915
			17.5378	24.9347	7.3969	-0.555225	0.680551
			17.6586	24.7416	7.08303	-0.241346	0.845956
		2	17.6495	24.7127	7.0632	-0.221521	0.857661
			17.5748	24.7627	7.18782	-0.346136	0.786688
			17.4187	24.785	7.36626	-0.52458	0.695162
		3	17.4084	24.972	7.56357	-0.721892	0.606302
			17.552	25.2075	7.65544	-0.813764	0.568896
			17.6283	24.8662	7.23796	-0.396277	0.759816
PRKCI	0h	1	17.6847	24.6426	6.95787	-0.234301	0.850097
			17.8126	24.6569	6.84432	-0.120746	0.919712
			17.8965	24.6375	6.74102	-0.0174456	0.98798
		2	18.0183	24.4916	6.47331	0.250267	1.18943
			17.95	24.4736	6.52361	0.199964	1.14867
			17.988	24.39	6.40204	0.321529	1.24965
		3	17.7248	24.6854	6.96064	-0.237064	0.84847
			17.7809	24.6033	6.82232	-0.0987445	0.933845
			17.7309	24.5179	6.78703	-0.0634586	0.956967
	4h	1	17.8447	24.9403	7.09558	-0.372006	0.772707
			17.8799	24.8563	6.97637	-0.252798	0.839267
			17.7878	24.9874	7.1996	-0.476024	0.718956
		2	17.9014	25.0157	7.11431	-0.390734	0.762741
			17.9874	24.7644	6.77698	-0.0534104	0.963656
			17.7416	24.8143	7.07274	-0.349168	0.785037
		3	17.8197	25.0202	7.20055	-0.476975	0.718483
			17.7208	24.9389	7.21811	-0.49454	0.709788
			17.6103	24.8829	7.27256	-0.548984	0.683501
	8h	1	17.7429	25.0411	7.29823	-0.57466	0.671444
			17.7246	25.043	7.3184	-0.594823	0.662126
			17.371	24.9009	7.52992	-0.806343	0.571829
		2	17.6725	25.0716	7.39918	-0.675607	0.626069
			17.6849	24.9368	7.25181	-0.528239	0.693401
			17.4944	24.8686	7.37416	-0.650591	0.637019
		3	17.6046	25.0085	7.40391	-0.680333	0.624021
			17.5459	25.0214	7.47555	-0.751977	0.593789
			17.4677	24.9284	7.46078	-0.737203	0.599901
	12h	1	18.4809	25.6005	7.11958	-0.396002	0.759962
			17.7189	25.6623	7.94333	-1.21976	0.429354
			17.4945	25.5534	8.05897	-1.33539	0.396284
		2	17.6142	25.5843	7.9701	-1.24653	0.42146
			17.5167	25.6285	8.11177	-1.3882	0.382042
			17.4302	25.6983	8.2681	-1.54452	0.342809
		3	17.5735	25.7286	8.15504	-1.43147	0.370754
			17.501	25.5894	8.08841	-1.36484	0.388279
			17.612	25.4466	7.83466	-1.11109	0.462944
	24h	1	17.4337	25.2715	7.83782	-1.11424	0.461933
			17.7025	25.8058	8.10326	-1.37968	0.384303
			17.6969	25.0321	7.3352	-0.611629	0.654457
		2	17.783	25.6541	7.87113	-1.14756	0.45139
			17.7168	25.1354	7.41859	-0.695017	0.617702
			17.5693	25.105	7.53577	-0.812198	0.569514
		3	17.6009	25.1136	7.51277	-0.789201	0.578665
			17.5925	25.0524	7.45985	-0.73628	0.600285
			17.5123	25.1181	7.60583	-0.882255	0.542519

## Sheet: Sheet1
	circ-PRKCI expression (A group)										PRKCI mRNA expression (B group)
0h (Row 1)	0.973	1.126	0.975	1.009	1.137	1.195	0.869	0.767	1.024		0.85	0.92	0.988	1.189	1.149	1.25	0.848	0.934	0.957
4h (Row 2)	0.88	0.912	0.862	0.859	1.01	0.87	0.794	0.814	0.74		0.773	0.839	0.719	0.763	0.964	0.785	0.718	0.71	0.684
8h (Row 3)	0.91	1.088	1.077	1.079	1.139	1.03	1.799	1.004	1.085		0.671	0.662	0.572	0.626	0.693	0.637	0.624	0.594	0.6
12h (Row 4)	0.566	0.66	0.641	0.772	0.694	0.845	0.602	0.611	0.634		0.76	0.429	0.396	0.421	0.382	0.343	0.371	0.388	0.463
24h (Row 5)	0.849	0.681	0.846	0.858	0.787	0.695	0.606	0.569	0.76		0.462	0.384	0.654	0.451	0.618	0.57	0.579	0.6	0.543
	Two-way RM ANOVA	Matching by cols
	Source of Variation	% of total variation	P value
	Interaction	12.32	< 0.0001
	Time	45.51	< 0.0001
	Column Factor	17.51	< 0.0001
	Subjects (matching)	4.2833	0.6364
	Source of Variation	P value summary	Significant?
	Interaction	***	Yes
	Time	***	Yes
	Column Factor	***	Yes
	Subjects (matching)	ns	No
	Source of Variation	Df	Sum-of-squares	Mean square	F
	Interaction	4	0.6576	0.1644	9.672
	Time	4	2.429	0.6072	35.72
	Column Factor	1	0.9343	0.9343	65.39
	Subjects (matching)	16	0.2286	0.01429	0.8406
	Residual	64	1.088	0.017
	Number of missing values	0
	Bonferroni posttests
	Column A vs Column B
	Column Factor	Column A	Column B	Difference	95% CI of diff.
	Row 1	1.008	1.009	0.001111	-0.1584 to 0.1607
	Row 2	0.8601	0.7728	-0.08733	-0.2469 to 0.07223
	Row 3	1.135	0.631	-0.5036	-0.6631 to -0.3440
	Row 4	0.6694	0.4392	-0.2302	-0.3898 to -0.07066
	Row 5	0.739	0.5401	-0.1989	-0.3584 to -0.03933
	Column Factor	Difference	t	P value	Summary
	Row 1	0.001111	0.01838	P > 0.05	ns
	Row 2	-0.08733	1.444	P > 0.05	ns
	Row 3	-0.5036	8.327	P<0.001	***
	Row 4	-0.2302	3.807	P<0.01	**
	Row 5	-0.1989	3.289	P<0.01	**
