# Supplementary material for: Has_circRNA_0122683 (circ-PRKCI) relieves ferroptosis of HPAEpiCs in sepsis-induced acute lung injury by sponging miR-382-5p
Source: PeerJ journal article supplement (doi:10.7717/peerj.19404), 2025-05-13
Supplement: Raw_data.zip [file Figure 2A Data.xlsx]

## Sheet: Sheet1
circ-PRKCI expression
Septic ALI patients	Healthy control
0.611	0.971
0.661	0.893
0.617	1.145		Area under the ROC curve
0.55	0.978		Area	0.9957
0.659	1.244		Std. Error	0.00469
0.553	1.029		95% confidence interval	0.9865 to 1.000
0.678	1.156		P value	<0.0001
0.658	1.415
0.607	1.445
0.545	1.446
0.62	1.037
0.588	0.833
0.588	0.968
0.648	1.255
0.609	1.064
0.605	0.758
0.604	1.355
0.545	0.752
0.612	0.923
0.644	0.866
0.707	0.927
0.599	0.979
0.625	0.992
0.618	0.944
0.846	0.976
0.574	0.978
0.654	0.949
0.654	1.009
0.641	0.841
0.603	1.18
0.565	1.114
	1.043
	1.061
	1.03
	0.958
	1.017
	1.06
	0.971
	1.088
	1.07
	1.182
	0.795
	0.83
	0.911
	0.926
	0.852
	0.85
	0.844
	0.88
	0.949
	0.98
	0.923
	0.981
