# Supplementary material for: Has_circRNA_0122683 (circ-PRKCI) relieves ferroptosis of HPAEpiCs in sepsis-induced acute lung injury by sponging miR-382-5p
Source: PeerJ journal article supplement (doi:10.7717/peerj.19404), 2025-05-13
Supplement: Raw_data.zip [file Figure 2B Data.xlsx]

## Sheet: Sheet1
circ-PRKCI expression
Septic ALI patients	Septic non-ALI patients
0.611	0.952
0.661	0.939
0.617	0.897
0.55	0.982		Area under the ROC curve
0.659	0.991		Area	0.9993
0.553	0.847		Std. Error	0.00112
0.678	0.848		95% confidence interval	0.9971 to 1.000
0.658	0.951		P value	<0.0001
0.607	0.97
0.545	1.148
0.62	0.858
0.588	0.866
0.588	1.004
0.648	0.879
0.609	0.978
0.605	0.897
0.604	0.921
0.545	0.878
0.612	1.002
0.644	0.928
0.707	0.861
0.599	0.937
0.625	0.99
0.618	0.929
0.846	1.116
0.574	0.955
0.654	0.97
0.654	0.964
0.641	0.908
0.603	0.869
0.565	0.884
	0.89
	0.91
	1
	0.903
	0.988
	0.962
	1.175
	1.353
	1.067
	1.051
	0.924
	0.937
	1.004
	0.94
	0.971
	0.864
	0.744
	0.851
