# Supplementary material for: Has_circRNA_0122683 (circ-PRKCI) relieves ferroptosis of HPAEpiCs in sepsis-induced acute lung injury by sponging miR-382-5p
Source: PeerJ journal article supplement (doi:10.7717/peerj.19404), 2025-05-13
Supplement: Raw_data.zip [file Figure 3A Data.xlsx]

## Sheet: circ-PRKCI---PRKCI
										Detection index	group	Mean internal parameter	Average target gene	ΔCt	—ΔΔCt	Relative expression level	SD
Gene name	group		GAPDH	Target gene	ΔCt	—ΔΔCt	Relative expression level			circ-PRKCI	circ-NC vector	17.746	24.429	6.68307	0	1	0.116051
circ-PRKCI	circ-NC vector	1	17.8069	24.4841	6.67725	0.00581787	1.00404				circ-PRKCI vector	17.6682	21.0351	3.36691	3.31615	9.96006	1.15474
			17.6136	24.4751	6.8615	-0.17843	0.883664			PRKCI	circ-NC vector	17.5775	24.2153	6.63785	0	1	0.072634
			17.6725	24.572	6.89954	-0.216471	0.860668				circ-PRKCI vector	17.5732	24.1673	6.59412	0.0437274	1.03077	0.130893
		2	17.9254	24.3799	6.45458	0.228492	1.17161
			17.7865	24.3787	6.59219	0.0908814	1.06502
			17.8047	24.2386	6.4339	0.249167	1.18852
		3	17.8007	24.5299	6.72921	-0.0461465	0.96852
			17.6726	24.4532	6.78057	-0.0975072	0.934647
			17.6307	24.3496	6.71887	-0.0358033	0.975488
	circ-PRKCI vector	1	17.7356	21.1194	3.38378	3.29929	9.84428
			17.7053	21.0139	3.30862	3.37444	10.3707
			17.6227	21.1139	3.49112	3.19194	9.13841
		2	17.7606	20.971	3.21042	3.47264	11.1012
			17.8957	20.9525	3.05682	3.62625	12.3484
			17.5979	20.9479	3.35002	3.33305	10.0774
		3	17.6663	21.1249	3.45854	3.22453	9.34714
			17.5574	21.0027	3.44532	3.23775	9.43319
			17.472	21.0695	3.59756	3.0855	8.48846
PRKCI	circ-NC vector	1	17.5844	24.2579	6.67351	-0.0356621	0.975584
			17.6913	24.2533	6.56202	0.0758309	1.05397
			17.4831	24.1788	6.69575	-0.0578994	0.960662
		2	17.6136	24.2156	6.602	0.0358425	1.02516
			17.5717	24.1913	6.61957	0.0182789	1.01275
			17.7186	24.1517	6.43314	0.204702	1.15245
		3	17.4541	24.2561	6.80191	-0.164062	0.892509
			17.5595	24.2515	6.69204	-0.054197	0.96313
			17.5211	24.1818	6.66068	-0.0228335	0.984298
	circ-PRKCI vector	1	17.5793	23.9581	6.37874	0.259103	1.19673
			17.5477	24.0008	6.45312	0.18473	1.1366
			17.7331	24.6664	6.93336	-0.295512	0.814783
		2	17.6113	24.4829	6.87159	-0.233746	0.850424
			17.5341	23.9745	6.44042	0.197422	1.14665
			17.5631	24.0831	6.51997	0.117875	1.08514
		3	17.5497	24.1681	6.61847	0.0193771	1.01352
			17.4451	23.966	6.5209	0.11695	1.08444
			17.5957	24.2062	6.6105	0.0273465	1.01914

## Sheet: Sheet1
circ-PRKCI expression											PRKCI mRNA expression
circ-NC vector (A group)	1.004	0.884	0.861	1.172	1.065	1.189	0.969	0.935	0.975		circ-NC vector (A group)	0.976	1.054	0.961	1.025	1.013	1.152	0.893	0.963	0.984
circ-PRKCI vector (B group)	9.844	10.371	9.138	11.101	12.348	10.077	9.347	9.433	8.488		circ-PRKCI vector (B group)	1.197	1.137	0.815	0.85	1.147	1.085	1.014	1.084	1.019
	Table Analyzed	Data 1										Table Analyzed	Data 1
	Column A											Column A
	vs	vs										vs	vs
	Column B											Column B
	Unpaired t test											Unpaired t test
	P value	< 0.0001										P value	0.477
	P value summary	***										P value summary	ns
	Are means signif. different? (P < 0.05)	Yes										Are means signif. different? (P < 0.05)	No
	One- or two-tailed P value?	Two-tailed										One- or two-tailed P value?	Two-tailed
	t, df	t=23.29 df=16										t, df	t=0.7282 df=16
