# Supplementary material for: Has_circRNA_0122683 (circ-PRKCI) relieves ferroptosis of HPAEpiCs in sepsis-induced acute lung injury by sponging miR-382-5p
Source: PeerJ journal article supplement (doi:10.7717/peerj.19404), 2025-05-13
Supplement: Raw_data.zip [file Figure 3B Data.xlsx]

## Sheet: Sheet1
Absorbance value（450 nm）
	Repeat 1			Repeat 2			Repeat 3
A group	0.77	0.87	0.75	0.66	0.71	0.76	0.75	0.71	0.7
B group	0.38	0.45	0.44	0.45	0.39	0.41	0.45	0.43	0.42
C group	0.46	0.51	0.42	0.44	0.45	0.39	0.49	0.49	0.46
D group	0.69	0.58	0.56	0.68	0.62	0.59	0.57	0.666	0.61
E group	0.16	0.21	0.22	0.26	0.17	0.21	0.24	0.24	0.22
F group	0.26	0.27	0.33	0.25	0.31	0.24	0.32	0.35	0.31
	One-way analysis of variance
	P value	< 0.0001
	P value summary	***
	Are means signif. different? (P < 0.05)	Yes
	Number of groups	6
	F	197.5
	R squared	0.9537
	Tukey's Multiple Comparison Test	Mean Diff.	q	Significant? P < 0.05?	Summary	95% CI of diff
	Column A vs Column B	0.3178	22.67	Yes	***	0.2588 to 0.3767
	Column A vs Column C	0.2856	20.37	Yes	***	0.2266 to 0.3445
	Column A vs Column D	0.1238	8.83	Yes	***	0.06484 to 0.1827
	Column A vs Column E	0.5278	37.65	Yes	***	0.4688 to 0.5867
	Column A vs Column F	0.4489	32.02	Yes	***	0.3900 to 0.5078
	Column B vs Column C	-0.03222	2.299	No	ns	-0.09116 to 0.02672
	Column B vs Column D	-0.194	13.84	Yes	***	-0.2529 to -0.1351
	Column B vs Column E	0.21	14.98	Yes	***	0.1511 to 0.2689
	Column B vs Column F	0.1311	9.353	Yes	***	0.07217 to 0.1901
	Column C vs Column D	-0.1618	11.54	Yes	***	-0.2207 to -0.1028
	Column C vs Column E	0.2422	17.28	Yes	***	0.1833 to 0.3012
	Column C vs Column F	0.1633	11.65	Yes	***	0.1044 to 0.2223
	Column D vs Column E	0.404	28.82	Yes	***	0.3451 to 0.4629
	Column D vs Column F	0.3251	23.19	Yes	***	0.2662 to 0.3840
	Column E vs Column F	-0.07889	5.628	Yes	**	-0.1378 to -0.01995
