# Supplementary material for: Has_circRNA_0122683 (circ-PRKCI) relieves ferroptosis of HPAEpiCs in sepsis-induced acute lung injury by sponging miR-382-5p
Source: PeerJ journal article supplement (doi:10.7717/peerj.19404), 2025-05-13
Supplement: Raw_data.zip [file Figure 3C Data.xlsx]

## Sheet: Sheet1
Fe 2+ concentration（nmol/ml）
	Repeat 1			Repeat 2			Repeat 3			mean	Relative multiple change
A group	125.77	146.62	140.23	155.12	142.18	155.3	131.57	123.86	159.25	142.211	1
B group	465.26	518.27	495.92	536.03	457.32	477.23	557.84	476.52	433.08	490.83	3.45142
C group	438.1	464.11	476.88	434.5	433.72	445.25	455.55	409.68	434.79	443.62	3.11945
D group	190.21	171.61	250.3	223.88	236.81	230.41	249.45	223.54	178.58	217.199	1.5273
E group	758.18	829.08	767.66	811.83	716.31	889.35	871.46	842.69	784.88	807.938	5.68126
F group	714.27	743.9	617.8	656.5	651.1	723.65	700.84	658.84	662.62	681.058	4.78906
	One-way analysis of variance
	P value	< 0.0001
	P value summary	***
	Are means signif. different? (P < 0.05)	Yes
	Number of groups	6
	F	451.6
	R squared	0.9792
	Tukey's Multiple Comparison Test	Mean Diff.	q	Significant? P < 0.05?	Summary	95% CI of diff
	Column A vs Column B	-348.6	28.79	Yes	***	-399.5 to -297.7
	Column A vs Column C	-301.4	24.89	Yes	***	-352.3 to -250.5
	Column A vs Column D	-74.99	6.193	Yes	***	-125.9 to -24.08
	Column A vs Column E	-665.7	54.98	Yes	***	-716.6 to -614.8
	Column A vs Column F	-538.8	44.51	Yes	***	-589.8 to -487.9
	Column B vs Column C	47.21	3.899	No	ns	-3.695 to 98.11
	Column B vs Column D	273.6	22.6	Yes	***	222.7 to 324.5
	Column B vs Column E	-317.1	26.19	Yes	***	-368.0 to -266.2
	Column B vs Column F	-190.2	15.71	Yes	***	-241.1 to -139.3
	Column C vs Column D	226.4	18.7	Yes	***	175.5 to 277.3
	Column C vs Column E	-364.3	30.09	Yes	***	-415.2 to -313.4
	Column C vs Column F	-237.4	19.61	Yes	***	-288.3 to -186.5
	Column D vs Column E	-590.7	48.79	Yes	***	-641.6 to -539.8
	Column D vs Column F	-463.9	38.31	Yes	***	-514.8 to -413.0
	Column E vs Column F	126.9	10.48	Yes	***	75.98 to 177.8
