# Supplementary material for: Has_circRNA_0122683 (circ-PRKCI) relieves ferroptosis of HPAEpiCs in sepsis-induced acute lung injury by sponging miR-382-5p
Source: PeerJ journal article supplement (doi:10.7717/peerj.19404), 2025-05-13
Supplement: Raw_data.zip [file Figure 3E Data.xlsx]

## Sheet: Sheet1
ROS fluorescence intensity
	Repeat 1			Repeat 2			Repeat 3			mean	Relative multiple change
A group	1800	1492	1561	1354	1588	1455	1513	1684	1664	1567.89	1
B group	3709	3445	3518	4271	3688	3432	3791	3896	3758	3723.11	2.3746
C group	3802	3454	3591	3814	3628	3742	3581	3619	3494	3636.11	2.31911
D group	2617	2754	2368	2524	2783	2657	2267	2566	2814	2594.44	1.65474
E group	12590	11446	12478	11728	12392	11476	12506	11783	11708	12011.9	7.66119
F group	15764	15368	14490	14642	13581	14442	13809	12452	14410	14328.7	9.13883
	One-way analysis of variance
	P value	< 0.0001
	P value summary	***
	Are means signif. different? (P < 0.05)	Yes
	Number of groups	6
	F	1209
	R squared	0.9921
	Tukey's Multiple Comparison Test	Mean Diff.	q	Significant? P < 0.05?	Summary	95% CI of diff
	Column A vs Column B	-2155	13.82	Yes	***	-2811 to -1500
	Column A vs Column C	-2068	13.27	Yes	***	-2724 to -1413
	Column A vs Column D	-1027	6.584	Yes	***	-1682 to -371.1
	Column A vs Column E	-10440	66.99	Yes	***	-11100 to -9789
	Column A vs Column F	-12760	81.85	Yes	***	-13420 to -12110
	Column B vs Column C	87	0.558	No	ns	-568.5 to 742.5
	Column B vs Column D	1129	7.239	Yes	***	473.2 to 1784
	Column B vs Column E	-8289	53.16	Yes	***	-8944 to -7633
	Column B vs Column F	-10610	68.02	Yes	***	-11260 to -9950
	Column C vs Column D	1042	6.681	Yes	***	386.2 to 1697
	Column C vs Column E	-8376	53.72	Yes	***	-9031 to -7720
	Column C vs Column F	-10690	68.58	Yes	***	-11350 to -10040
	Column D vs Column E	-9417	60.4	Yes	***	-10070 to -8762
	Column D vs Column F	-11730	75.26	Yes	***	-12390 to -11080
	Column E vs Column F	-2317	14.86	Yes	***	-2972 to -1661
