# Supplementary material for: Has_circRNA_0122683 (circ-PRKCI) relieves ferroptosis of HPAEpiCs in sepsis-induced acute lung injury by sponging miR-382-5p
Source: PeerJ journal article supplement (doi:10.7717/peerj.19404), 2025-05-13
Supplement: Raw_data.zip [file Figure 3F Data.xlsx]

## Sheet: Sheet1
MDA concentration（nmol/ml）
	Repeat 1			Repeat 2			Repeat 3			mean	Relative multiple change
A group	85.65	75.78	91.47	84.25	79.39	77.77	82.7	78.94	86.98	82.5478	1
B group	139.52	144.05	158.6	150.46	158.96	139.86	153.13	140.23	138.92	147.081	1.78177
C group	169.68	152.83	179.43	148.08	177.1	150.17	154.27	153.66	166.03	161.25	1.95341
D group	126.58	102.49	106.89	108.74	116.3	95.77	88.37	92.55	100.62	104.257	1.26299
E group	329.44	287.03	291.04	291.4	314.84	323.01	296.88	330.23	278.97	304.76	3.69192
F group	184.93	179.39	179.28	189.61	189.95	184.75	186.64	183.26	166.7	182.723	2.21355
	One-way analysis of variance
	P value	< 0.0001
	P value summary	***
	Are means signif. different? (P < 0.05)	Yes
	Number of groups	6
	F	403.9
	R squared	0.9768
	Tukey's Multiple Comparison Test	Mean Diff.	q	Significant? P < 0.05?	Summary	95% CI of diff
	Column A vs Column B	-64.53	16.56	Yes	***	-80.92 to -48.15
	Column A vs Column C	-78.7	20.2	Yes	***	-95.09 to -62.32
	Column A vs Column D	-21.71	5.571	Yes	**	-38.09 to -5.326
	Column A vs Column E	-222.2	57.03	Yes	***	-238.6 to -205.8
	Column A vs Column F	-100.2	25.71	Yes	***	-116.6 to -83.79
	Column B vs Column C	-14.17	3.636	No	ns	-30.55 to 2.214
	Column B vs Column D	42.82	10.99	Yes	***	26.44 to 59.21
	Column B vs Column E	-157.7	40.47	Yes	***	-174.1 to -141.3
	Column B vs Column F	-35.64	9.147	Yes	***	-52.03 to -19.26
	Column C vs Column D	56.99	14.63	Yes	***	40.61 to 73.38
	Column C vs Column E	-143.5	36.83	Yes	***	-159.9 to -127.1
	Column C vs Column F	-21.47	5.511	Yes	**	-37.86 to -5.090
	Column D vs Column E	-200.5	51.46	Yes	***	-216.9 to -184.1
	Column D vs Column F	-78.47	20.14	Yes	***	-94.85 to -62.08
	Column E vs Column F	122	31.32	Yes	***	105.7 to 138.4
