# Supplementary material for: Has_circRNA_0122683 (circ-PRKCI) relieves ferroptosis of HPAEpiCs in sepsis-induced acute lung injury by sponging miR-382-5p
Source: PeerJ journal article supplement (doi:10.7717/peerj.19404), 2025-05-13
Supplement: Raw_data.zip [file Figure 3G Data.xlsx]

## Sheet: Sheet1
GSH concentration（nmol/ml）
	Repeat 1			Repeat 2			Repeat 3			mean	Relative multiple change
A group	33.64	34.02	39.18	41.97	42.47	42.61	42.31	33.98	39.55	38.8589	1
B group	9.82	8.93	10.38	7.93	8.55	9.82	6.82	7.21	9.95	8.82333	0.227061
C group	6.64	6.98	7.29	5.15	4.45	4.93	8.05	5.12	5.07	5.96444	0.15349
D group	116.21	89.64	83.35	102.72	90.31	80.41	113.07	103.56	34.18	90.3833	2.32594
E group	35.56	32.1	27.89	29.87	28.76	23.55	32.09	27.08	28.76	29.5178	0.759615
F group	57.48	42.78	60.24	47.67	62.31	53.24	49.3	38.78	53.24	51.6711	1.32971
	One-way analysis of variance
	P value	< 0.0001
	P value summary	***
	Are means signif. different? (P < 0.05)	Yes
	Number of groups	6
	F	75.92
	R squared	0.8877
	Tukey's Multiple Comparison Test	Mean Diff.	q	Significant? P < 0.05?	Summary	95% CI of diff
	Column A vs Column B	30.04	8.377	Yes	***	14.96 to 45.11
	Column A vs Column C	32.89	9.175	Yes	***	17.82 to 47.97
	Column A vs Column D	-51.52	14.37	Yes	***	-66.60 to -36.45
	Column A vs Column E	9.341	2.605	No	ns	-5.733 to 24.42
	Column A vs Column F	-12.81	3.573	No	ns	-27.89 to 2.262
	Column B vs Column C	2.859	0.7974	No	ns	-12.22 to 17.93
	Column B vs Column D	-81.56	22.75	Yes	***	-96.63 to -66.49
	Column B vs Column E	-20.69	5.772	Yes	**	-35.77 to -5.620
	Column B vs Column F	-42.85	11.95	Yes	***	-57.92 to -27.77
	Column C vs Column D	-84.42	23.55	Yes	***	-99.49 to -69.34
	Column C vs Column E	-23.55	6.569	Yes	***	-38.63 to -8.479
	Column C vs Column F	-45.71	12.75	Yes	***	-60.78 to -30.63
	Column D vs Column E	60.87	16.98	Yes	***	45.79 to 75.94
	Column D vs Column F	38.71	10.8	Yes	***	23.64 to 53.79
	Column E vs Column F	-22.15	6.179	Yes	***	-37.23 to -7.079
