# Supplementary material for: Has_circRNA_0122683 (circ-PRKCI) relieves ferroptosis of HPAEpiCs in sepsis-induced acute lung injury by sponging miR-382-5p
Source: PeerJ journal article supplement (doi:10.7717/peerj.19404), 2025-05-13
Supplement: Raw_data.zip [file Figure 4A Data.xlsx]

## Sheet: Sheet1
IL-6 concentration（ng/ml）
	Repeat 1			Repeat 2			Repeat 3
A group	0.037	0.036	0.044	0.031	0.031	0.035	0.04	0.044	0.042
B group	0.47	0.51	0.48	0.45	0.42	0.43	0.49	0.53	0.49
C group	0.52	0.55	0.43	0.46	0.63	0.56	0.47	0.49	0.63
D group	0.39	0.37	0.37	0.31	0.31	0.36	0.34	0.39	0.32
E group	0.48	0.48	0.55	0.47	0.42	0.49	0.44	0.46	0.43
F group	0.86	0.72	0.69	0.75	0.75	0.78	0.79	0.82	0.81
	One-way analysis of variance
	P value	< 0.0001
	P value summary	***
	Are means signif. different? (P < 0.05)	Yes
	Number of groups	6
	F	265.8
	R squared	0.9651
	Tukey's Multiple Comparison Test	Mean Diff.	q	Significant? P < 0.05?	Summary	95% CI of diff
	Column A vs Column B	-0.4367	29.5	Yes	***	-0.4989 to -0.3744
	Column A vs Column C	-0.4889	33.03	Yes	***	-0.5511 to -0.4267
	Column A vs Column D	-0.3133	21.17	Yes	***	-0.3756 to -0.2511
	Column A vs Column E	-0.4311	29.13	Yes	***	-0.4933 to -0.3689
	Column A vs Column F	-0.7367	49.77	Yes	***	-0.7989 to -0.6744
	Column B vs Column C	-0.05222	3.529	No	ns	-0.1144 to 0.01000
	Column B vs Column D	0.1233	8.333	Yes	***	0.06111 to 0.1856
	Column B vs Column E	0.005556	0.3754	No	ns	-0.05667 to 0.06778
	Column B vs Column F	-0.3	20.27	Yes	***	-0.3622 to -0.2378
	Column C vs Column D	0.1756	11.86	Yes	***	0.1133 to 0.2378
	Column C vs Column E	0.05778	3.904	No	ns	-0.004447 to 0.1200
	Column C vs Column F	-0.2478	16.74	Yes	***	-0.3100 to -0.1856
	Column D vs Column E	-0.1178	7.958	Yes	***	-0.1800 to -0.05555
	Column D vs Column F	-0.4233	28.6	Yes	***	-0.4856 to -0.3611
	Column E vs Column F	-0.3056	20.65	Yes	***	-0.3678 to -0.2433
