# Supplementary material for: Has_circRNA_0122683 (circ-PRKCI) relieves ferroptosis of HPAEpiCs in sepsis-induced acute lung injury by sponging miR-382-5p
Source: PeerJ journal article supplement (doi:10.7717/peerj.19404), 2025-05-13
Supplement: Raw_data.zip [file Figure 4B Data.xlsx]

## Sheet: Sheet1
IL-1β concentration（ng/ml）
	Repeat 1			Repeat 2			Repeat 3
A group	0.009	0.018	0.013	0.014	0.008	0.017	0.009	0.007	0.013
B group	0.55	0.58	0.49	0.61	0.49	0.51	0.49	0.52	0.74
C group	0.56	0.53	0.53	0.56	0.54	0.57	0.52	0.54	0.55
D group	0.19	0.16	0.16	0.11	0.19	0.15	0.13	0.17	0.19
E group	0.28	0.29	0.26	0.29	0.29	0.27	0.25	0.29	0.28
F group	0.26	0.26	0.24	0.23	0.2	0.24	0.23	0.18	0.23
	One-way analysis of variance
	P value	< 0.0001
	P value summary	***
	Are means signif. different? (P < 0.05)	Yes
	Number of groups	6
	F	287.4
	R squared	0.9677
	Tukey's Multiple Comparison Test	Mean Diff.	q	Significant? P < 0.05?	Summary	95% CI of diff
	Column A vs Column B	-0.5413	42.65	Yes	***	-0.5947 to -0.4880
	Column A vs Column C	-0.5324	41.95	Yes	***	-0.5858 to -0.4791
	Column A vs Column D	-0.1491	11.75	Yes	***	-0.2025 to -0.09575
	Column A vs Column E	-0.2658	20.94	Yes	***	-0.3191 to -0.2124
	Column A vs Column F	-0.218	17.18	Yes	***	-0.2714 to -0.1646
	Column B vs Column C	0.008889	0.7003	No	ns	-0.04447 to 0.06225
	Column B vs Column D	0.3922	30.9	Yes	***	0.3389 to 0.4456
	Column B vs Column E	0.2756	21.71	Yes	***	0.2222 to 0.3289
	Column B vs Column F	0.3233	25.47	Yes	***	0.2700 to 0.3767
	Column C vs Column D	0.3833	30.2	Yes	***	0.3300 to 0.4367
	Column C vs Column E	0.2667	21.01	Yes	***	0.2133 to 0.3200
	Column C vs Column F	0.3144	24.77	Yes	***	0.2611 to 0.3678
	Column D vs Column E	-0.1167	9.192	Yes	***	-0.1700 to -0.06330
	Column D vs Column F	-0.06889	5.428	Yes	**	-0.1223 to -0.01553
	Column E vs Column F	0.04778	3.764	No	ns	-0.005586 to 0.1011
