# Supplementary material for: Has_circRNA_0122683 (circ-PRKCI) relieves ferroptosis of HPAEpiCs in sepsis-induced acute lung injury by sponging miR-382-5p
Source: PeerJ journal article supplement (doi:10.7717/peerj.19404), 2025-05-13
Supplement: Raw_data.zip [file Figure 4C Data.xlsx]

## Sheet: Sheet1
TNF-α concentration（ng/ml）
	Repeat 1			Repeat 2			Repeat 3
A group	0.19	0.09	0.16	0.17	0.13	0.15	0.14	0.12	0.17
B group	1.26	1.23	1.38	1.22	1.15	1.13	1.24	1.24	1.22
C group	1.15	1.07	1.17	1.08	1.22	1.21	1.19	1.25	1.14
D group	0.84	0.68	0.83	0.85	0.7	0.79	0.92	1.03	0.78
E group	1.84	1.84	2.06	2.17	2.07	1.87	1.69	1.98	1.86
F group	1.29	1.47	1.27	1.33	1.28	1.32	1.48	1.37	1.31
	One-way analysis of variance
	P value	< 0.0001
	P value summary	***
	Are means signif. different? (P < 0.05)	Yes
	Number of groups	6
	F	374.5
	R squared	0.975
	Tukey's Multiple Comparison Test	Mean Diff.	q	Significant? P < 0.05?	Summary	95% CI of diff
	Column A vs Column B	-1.083	35.26	Yes	***	-1.213 to -0.9541
	Column A vs Column C	-1.083	35.26	Yes	***	-1.213 to -0.9541
	Column A vs Column D	-0.6778	22.06	Yes	***	-0.8070 to -0.5486
	Column A vs Column E	-1.784	58.07	Yes	***	-1.914 to -1.655
	Column A vs Column F	-1.2	39.05	Yes	***	-1.329 to -1.071
	Column B vs Column C	0	0	No	ns	-0.1292 to 0.1292
	Column B vs Column D	0.4056	13.2	Yes	***	0.2764 to 0.5348
	Column B vs Column E	-0.7011	22.82	Yes	***	-0.8303 to -0.5719
	Column B vs Column F	-0.1167	3.797	No	ns	-0.2459 to 0.01253
	Column C vs Column D	0.4056	13.2	Yes	***	0.2764 to 0.5348
	Column C vs Column E	-0.7011	22.82	Yes	***	-0.8303 to -0.5719
	Column C vs Column F	-0.1167	3.797	No	ns	-0.2459 to 0.01253
	Column D vs Column E	-1.107	36.01	Yes	***	-1.236 to -0.9775
	Column D vs Column F	-0.5222	16.99	Yes	***	-0.6514 to -0.3930
	Column E vs Column F	0.5844	19.02	Yes	***	0.4552 to 0.7136
