# Supplementary material for: Has_circRNA_0122683 (circ-PRKCI) relieves ferroptosis of HPAEpiCs in sepsis-induced acute lung injury by sponging miR-382-5p
Source: PeerJ journal article supplement (doi:10.7717/peerj.19404), 2025-05-13
Supplement: Raw_data.zip [file Figure 5B Data.xlsx]

## Sheet: miR-382-5p
										Detection index	group	Mean internal parameter	Average target gene	ΔCt	—ΔΔCt	Relative expression level	SD
Gene name	group		U6	Target gene	ΔCt	—ΔΔCt	Relative expression level			miR-382-5p	healthy individuals	18.3574	26.8301	8.4727	0	1	0.435063
miR-382-5p	septic ALI	1	18.4715	25.3841	6.91258	1.56012	2.94878				septic ALI	18.3541	25.1501	6.79604	1.67665	3.19685	0.973039
		2	18.4203	25.4035	6.9832	1.48949	2.8079				septic non-ALI	18.3473	25.4636	7.11632	1.35638	2.56042	0.828519
		3	18.4568	25.3728	6.91604	1.55666	2.94172
		4	18.4259	25.4028	6.9769	1.4958	2.8202
		5	18.4803	25.2713	6.79107	1.68162	3.20788
		6	18.4327	25.4877	7.05496	1.41774	2.67167
		7	18.3325	25.2818	6.94931	1.52338	2.87464
		8	18.3491	25.211	6.86188	1.61081	3.05424
		9	18.2719	25.1785	6.90663	1.56607	2.96096
		10	18.3403	25.8023	7.46203	1.01067	2.01484
		11	18.0682	24.9043	6.83612	1.63658	3.10927
		12	18.2458	24.9059	6.66011	1.81259	3.51272
		13	18.5423	25.3423	6.79999	1.6727	3.18811
		14	18.5757	25.1633	6.58763	1.88507	3.69371
		15	18.4817	25.0644	6.58272	1.88997	3.70628
		16	18.4594	25.1558	6.69648	1.77621	3.42525
		17	18.4493	25.0647	6.61541	1.85729	3.62326
		18	18.4687	25.1793	6.71064	1.76206	3.39181
		19	18.3783	24.7322	6.35392	2.11878	4.34327
		20	18.3894	24.6492	6.2598	2.2129	4.63606
		21	18.1888	24.6623	6.47347	1.99923	3.99785
		22	18.2606	24.5451	6.28454	2.18815	4.55721
		23	18.1371	24.5028	6.36568	2.10701	4.30799
		24	18.1685	24.7081	6.53962	1.93308	3.81869
		25	18.2795	24.4583	6.17882	2.29387	4.90371
		26	18.305	24.6722	6.3671	2.10559	4.30374
		27	18.3525	24.6099	6.25747	2.21523	4.64355
		28	18.4014	24.6322	6.23079	2.24191	4.73022
		29	18.3501	26.3295	7.97944	0.493259	1.40762
		30	18.2929	26.319	8.02612	0.446571	1.3628
		31	18.1997	26.2566	8.05692	0.41578	1.33402
	septic non-ALI	1	18.2232	26.2789	8.05572	0.41698	1.33513
		2	18.2139	26.1828	7.96893	0.503767	1.41791
		3	18.2742	26.3069	8.03266	0.440032	1.35663
		4	18.1519	25.992	7.84014	0.632554	1.55031
		5	18.3079	25.8929	7.58501	0.887687	1.85021
		6	18.4112	26.4181	8.00689	0.465803	1.38109
		7	18.3996	26.0804	7.68085	0.791848	1.73129
		8	18.4035	25.3583	6.95476	1.51793	2.8638
		9	18.342	25.2927	6.95065	1.52205	2.87199
		10	18.2593	25.3087	7.04935	1.42335	2.68207
		11	18.2952	25.3594	7.06426	1.40843	2.65449
		12	18.2401	25.4914	7.25132	1.22137	2.33168
		13	18.2141	25.4931	7.27903	1.19367	2.28733
		14	18.139	25.5771	7.43811	1.03458	2.04852
		15	18.1789	25.4711	7.29217	1.18052	2.26659
		16	18.1643	25.9984	7.83409	0.638608	1.55683
		17	18.3097	26.011	7.70129	0.771401	1.70693
		18	18.312	25.0763	6.76435	1.70834	3.26786
		19	18.457	25.0795	6.62249	1.8502	3.60551
		20	18.4716	25.1007	6.62916	1.84353	3.58888
		21	18.4662	25.0838	6.61759	1.8551	3.61778
		22	18.4938	25.0936	6.59989	1.87281	3.66244
		23	18.484	25.2014	6.71744	1.75526	3.37587
		24	18.3489	25.0467	6.6978	1.77489	3.42213
		25	18.353	25.0322	6.6792	1.79349	3.46653
		26	18.3091	24.9221	6.61308	1.85962	3.62912
		27	18.7665	25.1211	6.35453	2.11816	4.3414
		28	18.2815	25.0928	6.81129	1.66141	3.16325
		29	18.1138	25.2507	7.13688	1.33581	2.52418
		30	18.65	25.3264	6.67638	1.79631	3.47331
		31	18.5895	25.5142	6.92474	1.54796	2.92403
		32	18.5058	25.4366	6.93088	1.54182	2.91162
		33	18.5067	25.4792	6.97257	1.50012	2.82867
		34	18.5431	25.4338	6.89068	1.58202	2.99388
		35	18.426	25.4591	7.03305	1.43964	2.71254
		36	18.4172	25.2604	6.84322	1.62947	3.094
		37	18.3872	25.214	6.82681	1.64588	3.1294
		38	18.2737	25.2296	6.95587	1.51682	2.8616
		39	18.2691	25.1103	6.84118	1.63152	3.09839
		40	18.2098	25.0818	6.87202	1.60068	3.03285
		41	18.3203	25.1856	6.86536	1.60734	3.04689
		42	18.3322	24.9156	6.58338	1.88931	3.70459
		43	18.3116	25.1411	6.82947	1.64322	3.12363
		44	18.39	25.0839	6.69392	1.77878	3.43135
		45	18.3775	25.2108	6.8333	1.63939	3.11535
		46	18.2909	25.0557	6.7648	1.7079	3.26684
		47	18.3033	25.1203	6.81698	1.65571	3.15078
		48	18.2598	27.0146	8.75478	-0.282081	0.822404
		49	18.269	26.8302	8.56121	-0.0885146	0.940491
	healthy individuals	1	18.2726	28.4528	10.1802	-1.70754	0.306182
		2	18.2821	28.2718	9.98973	-1.51703	0.349404
		3	18.1859	28.184	9.99806	-1.52536	0.347393
		4	18.2701	27.9593	9.68924	-1.21655	0.430312
		5	18.4972	26.8802	8.38295	0.0897436	1.06418
		6	18.5019	26.5835	8.0816	0.391098	1.31139
		7	18.5061	26.4495	7.94337	0.529327	1.44326
		8	18.4566	26.3728	7.91616	0.556531	1.47073
		9	18.3501	28.0288	9.67878	-1.20608	0.433445
		10	18.4002	27.8836	9.48337	-1.01067	0.496315
		11	18.317	27.6385	9.3215	-0.848804	0.555245
		12	18.2902	27.4792	9.18903	-0.716334	0.608642
		13	18.2008	26.4205	8.2197	0.252997	1.19168
		14	18.2208	26.5806	8.35976	0.112935	1.08143
		15	18.2319	26.7471	8.51518	-0.0424864	0.97098
		16	18.1662	26.897	8.73077	-0.25807	0.836206
		17	18.2627	26.6766	8.4139	0.0587936	1.04159
		18	18.4928	26.6265	8.13365	0.339046	1.26492
		19	18.4625	26.5478	8.0853	0.3874	1.30803
		20	18.4277	26.4883	8.06059	0.41211	1.33063
		21	18.5308	27.4058	8.87505	-0.402351	0.756624
		22	18.4804	27.7025	9.22208	-0.749387	0.594856
		23	18.3106	27.3657	9.0551	-0.582402	0.667851
		24	18.3312	27.3921	9.06094	-0.588246	0.665151
		25	18.3711	27.2294	8.85825	-0.385552	0.765486
		26	18.6961	27.4038	8.70761	-0.234913	0.849736
		27	18.3238	26.4054	8.08161	0.391088	1.31138
		28	18.4864	26.3795	7.89311	0.579586	1.49442
		29	18.6802	26.5375	7.8573	0.615392	1.53197
		30	18.4802	26.4086	7.92841	0.544282	1.45829
		31	18.5087	26.3188	7.81014	0.66256	1.58289
		32	18.5392	26.4928	7.95362	0.519073	1.43303
		33	18.3955	27.3302	8.93471	-0.462018	0.72597
		34	18.4259	27.3199	8.89409	-0.421394	0.746703
		35	18.4268	27.2374	8.81062	-0.337923	0.791179
		36	18.3136	27.2208	8.90728	-0.434581	0.739909
		37	18.242	27.0513	8.80925	-0.336551	0.791932
		38	18.274	27.2621	8.9881	-0.515401	0.699599
		39	18.1593	26.3825	8.22321	0.249483	1.18878
		40	18.3369	26.28	7.94314	0.529559	1.44349
		41	18.3845	26.2726	7.8881	0.5846	1.49962
		42	18.3835	26.2724	7.88883	0.583864	1.49886
		43	18.395	26.1775	7.78255	0.690143	1.61344
		44	18.3637	26.3141	7.95042	0.52228	1.43622
		45	18.2624	26.2608	7.99841	0.474288	1.38923
		46	18.2178	26.1525	7.93474	0.537953	1.45191
		47	18.2035	26.129	7.92549	0.547208	1.46126
		48	18.2456	26.0299	7.78437	0.688328	1.61142
		49	18.2105	25.8728	7.66227	0.810426	1.75373
		50	18.2496	25.8159	7.56635	0.90635	1.8743
		51	18.1207	26.0381	7.91743	0.555268	1.46944
		52	18.2754	26.2551	7.97974	0.492954	1.40732
		53	18.5236	26.1113	7.58772	0.88498	1.84674

## Sheet: Sheet1
miR-382-5p expression
septic ALI (A group)	septic non-ALI (B group)	healthy individuals (C group)
2.949	1.335	0.306		One-way analysis of variance
2.808	1.418	0.349		P value	< 0.0001
2.942	1.357	0.347		P value summary	***
2.82	1.55	0.43		Are means signif. different? (P < 0.05)	Yes
3.208	1.85	1.064		Number of groups	3
2.672	1.381	1.311		F	108.7
2.875	1.731	1.443		R squared	0.6258
3.054	2.864	1.471
2.961	2.872	0.433		Tukey's Multiple Comparison Test	Mean Diff.	q	Significant? P < 0.05?	Summary	95% CI of diff
2.015	2.682	0.496		Column A vs Column B	0.6458	5.377	Yes	***	0.2428 to 1.049
3.109	2.654	0.555		Column A vs Column C	2.263	19.12	Yes	***	1.866 to 2.660
3.513	2.332	0.609		Column B vs Column C	1.617	15.59	Yes	***	1.269 to 1.965
3.188	2.287	1.192
3.694	2.049	1.081
3.706	2.267	0.971
3.425	1.557	0.836
3.623	1.707	1.042
3.392	3.268	1.265
4.343	3.606	1.308
4.636	3.589	1.331
3.998	3.618	0.757
4.557	3.662	0.595
4.308	3.376	0.668
3.819	3.422	0.665
4.904	3.467	0.765
4.304	3.629	0.85
4.644	4.341	1.311
4.73	3.163	1.494
1.408	2.524	1.532
1.363	3.473	1.458
1.334	2.924	1.583
	2.912	1.433
	2.829	0.726
	2.994	0.747
	2.713	0.791
	3.094	0.74
	3.129	0.792
	2.862	0.7
	3.098	1.189
	3.033	1.443
	3.047	1.5
	3.705	1.499
	3.124	1.613
	3.431	1.436
	3.115	1.389
	3.267	1.452
	3.151	1.461
	0.822	1.611
	0.94	1.754
		1.874
		1.469
		1.407
		1.847
