# Supplementary material for: Has_circRNA_0122683 (circ-PRKCI) relieves ferroptosis of HPAEpiCs in sepsis-induced acute lung injury by sponging miR-382-5p
Source: PeerJ journal article supplement (doi:10.7717/peerj.19404), 2025-05-13
Supplement: Raw_data.zip [file Figure 5C Data.xlsx]

## Sheet: miR-382-5p
											Mean internal parameter	Average target gene	ΔCt	—ΔΔCt	Relative expression level	SD
Gene name	group		U6	Target gene	ΔCt	—ΔΔCt	Relative expression level			3h-untreated	17.8556	26.0577	8.2021	0	1	0.193034
miR-382-5p	3h-untreated	1	17.6735	26.0912	8.41779	-0.215682	0.861139			3h-LPS treated	17.8142	25.4699	7.65578	0.546325	1.46036	0.180979
			17.8347	26.1432	8.3085	-0.106394	0.928907			6h-untreated	17.7426	26.0723	8.32973	-0.127624	0.915338	0.103001
			17.8283	26.0085	8.18019	0.0219108	1.0153			6h-LPS treated	17.688	24.9895	7.30152	0.900582	1.86682	0.276041
		2	18.011	25.965	7.95402	0.248084	1.18763			12h-untreated	18.1869	25.9538	7.76688	0.435227	1.35212	0.264006
			18.0458	25.8826	7.83686	0.365244	1.2881			12h-LPS treated	18.0316	24.8328	6.80119	1.40092	2.64069	0.24293
			18.0111	25.875	7.86384	0.33826	1.26423			24h-untreated	17.9323	25.7168	7.78457	0.417536	1.33564	0.113136
		3	17.7345	26.2191	8.48467	-0.282561	0.82213			24h-LPS treated	17.799	24.0141	6.21509	1.98702	3.96417	0.617454
			17.7765	26.2132	8.43663	-0.234523	0.849966
			17.7848	26.1213	8.33644	-0.134339	0.911087
	3h-LPS treated	1	17.8244	25.5266	7.70217	0.499935	1.41415
			17.8077	25.431	7.62331	0.578795	1.4936
			17.7866	25.521	7.73435	0.467752	1.38295
		2	17.9769	25.4403	7.46331	0.738793	1.66878
			17.942	25.2966	7.35467	0.847435	1.7993
			17.873	25.5242	7.65113	0.550973	1.46507
		3	17.7666	25.481	7.71442	0.487687	1.4022
			17.7331	25.4005	7.66739	0.534716	1.44866
			17.6171	25.6084	7.99127	0.210836	1.15736
	6h-untreated	1	17.7725	26.1878	8.41526	-0.213154	0.862649
			17.6917	26.076	8.38434	-0.182238	0.881335
			17.679	25.9278	8.24877	-0.0466608	0.968175
		2	17.9239	26.0825	8.15859	0.0435131	1.03062
			17.8262	25.9014	8.07518	0.126924	1.09196
			17.7572	25.9966	8.23938	-0.037272	0.974496
		3	17.7317	26.1261	8.39439	-0.192282	0.87522
			17.6347	26.1032	8.46857	-0.266465	0.831354
			17.6663	26.2494	8.58308	-0.380978	0.767917
	6h-LPS treated	1	17.1744	24.9429	7.76846	0.43364	1.35064
			17.7001	24.9246	7.22451	0.977595	1.96918
			17.7622	25.0086	7.24642	0.955687	1.9395
		2	17.8905	24.9809	7.09043	1.11167	2.16096
			17.6859	24.8822	7.19633	1.00577	2.00802
			17.7886	24.7948	7.00623	1.19587	2.29083
		3	17.731	25.0906	7.3596	0.842502	1.79316
			17.6627	25.0467	7.38406	0.818041	1.76301
			17.7967	25.2343	7.43764	0.764464	1.69874
	12h-untreated	1	18.2579	26.1057	7.84776	0.354345	1.2784
			18.3256	26.1235	7.79784	0.404268	1.32342
			18.1858	26.096	7.91013	0.291973	1.22431
		2	18.3003	25.8209	7.52064	0.681461	1.60376
			18.2532	25.7618	7.50864	0.693469	1.61717
			18.4091	25.7065	7.29745	0.904655	1.8721
		3	17.9144	26.0078	8.09335	0.108754	1.0783
			18.0597	26.0516	7.99194	0.210161	1.15682
			17.9763	25.9105	7.93415	0.267955	1.2041
	12h-LPS treated	1	18.1592	24.8229	6.6637	1.53841	2.90474
			18.0958	24.904	6.80825	1.39386	2.6278
			18.1028	24.9613	6.85851	1.3436	2.53783
		2	18.1549	24.8043	6.64939	1.55272	2.93369
			18.0679	24.7686	6.70067	1.50143	2.83124
			18.0556	24.7505	6.69494	1.50716	2.84251
		3	17.9316	24.806	6.87446	1.32764	2.50992
			17.9318	24.8421	6.91032	1.29178	2.4483
			17.7847	24.8351	7.05046	1.15164	2.22167
	24h-untreated	1	18.0425	25.783	7.74058	0.461529	1.377
			18.0237	25.7269	7.70323	0.498875	1.41311
			17.9774	25.6423	7.66494	0.537168	1.45112
		2	18.0547	25.6859	7.6313	0.570808	1.48535
			18.004	25.699	7.69499	0.50711	1.4212
			17.7906	25.6302	7.83961	0.362495	1.28565
		3	17.829	25.7656	7.93661	0.265499	1.20205
			17.8641	25.7644	7.90027	0.301833	1.23271
			17.8045	25.7541	7.9496	0.252504	1.19127
	24h-LPS treated	1	17.863	24.1244	6.26141	1.9407	3.83891
			18.0162	24.1163	6.10014	2.10196	4.29292
			17.6239	23.5999	5.97603	2.22607	4.67858
		2	17.9335	24.0849	6.15138	2.05072	4.14313
			17.7465	24.0406	6.29412	1.90799	3.75285
			17.8898	23.7494	5.85959	2.34252	5.07188
		3	17.8104	24.1259	6.31547	1.88664	3.69772
			17.7267	24.0955	6.36875	1.83335	3.56365
			17.581	24.1899	6.60889	1.59322	3.01722

## Sheet: Sheet1
miR-382-5p expression	untreated (A group)										LPS treated (B group)
3h (Row 1)	0.861	0.929	1.015	1.188	1.288	1.264	0.822	0.85	0.911		1.414	1.494	1.383	1.669	1.799	1.465	1.402	1.449	1.157
6h (Row 2)	0.863	0.881	0.968	1.031	1.092	0.974	0.875	0.831	0.768		1.351	1.969	1.94	2.161	2.008	2.291	1.793	1.763	1.699
12h (Row 3)	1.278	1.323	1.224	1.604	1.617	1.872	1.078	1.157	1.204		2.905	2.628	2.538	2.934	2.831	2.843	2.51	2.448	2.222
24h (Row 4)	1.377	1.413	1.451	1.485	1.421	1.286	1.202	1.233	1.191		3.839	4.293	4.679	4.143	3.753	5.072	3.698	3.564	3.017
	Two-way RM ANOVA	Matching by cols
	Source of Variation	% of total variation	P value
	Interaction	16.6	< 0.0001
	Time	31.45	< 0.0001
	Column Factor	44.51	< 0.0001
	Subjects (matching)	4.0591	0.0003
	Source of Variation	P value summary	Significant?
	Interaction	***	Yes
	Time	***	Yes
	Column Factor	***	Yes
	Subjects (matching)	***	Yes
	Source of Variation	Df	Sum-of-squares	Mean square	F
	Interaction	3	12.08	4.028	78.65
	Time	3	22.89	7.63	149
	Column Factor	1	32.4	32.4	175.5
	Subjects (matching)	16	2.954	0.1846	3.606
	Residual	48	2.458	0.05121
	Number of missing values	0
	Bonferroni posttests
	Column A vs Column B
	Column Factor	Column A	Column B	Difference	95% CI of diff.
	Row 1	1.014	1.47	0.456	0.1036 to 0.8084
	Row 2	0.9203	1.886	0.9658	0.6134 to 1.318
	Row 3	1.373	2.651	1.278	0.9256 to 1.630
	Row 4	1.34	4.006	2.667	2.314 to 3.019
	Column Factor	Difference	t	P value	Summary
	Row 1	0.456	3.326	P<0.01	**
	Row 2	0.9658	7.045	P<0.001	***
	Row 3	1.278	9.323	P<0.001	***
	Row 4	2.667	19.45	P<0.001	***
