# Supplementary material for: Has_circRNA_0122683 (circ-PRKCI) relieves ferroptosis of HPAEpiCs in sepsis-induced acute lung injury by sponging miR-382-5p
Source: PeerJ journal article supplement (doi:10.7717/peerj.19404), 2025-05-13
Supplement: Raw_data.zip [file Figure 6B Data.xlsx]

## Sheet: miR-382-5p mimic
										Detection index	group	Mean internal parameter	Average target gene	ΔCt	—ΔΔCt	Relative expression level	SD
Gene name	group		U6	Target gene	ΔCt	—ΔΔCt	Relative expression level			miR-382-5p mimic	mimic NC	17.746	24.429	6.68307	0	1	0.116051
miR-382-5p mimic	mimic NC	1	17.8069	24.4841	6.67725	0.00581787	1.00404				miR-382-5p mimic	17.6682	21.0351	3.36691	3.31615	9.96006	1.15474
			17.6136	24.4751	6.8615	-0.17843	0.883664
			17.6725	24.572	6.89954	-0.216471	0.860668
		2	17.9254	24.3799	6.45458	0.228492	1.17161
			17.7865	24.3787	6.59219	0.0908814	1.06502
			17.8047	24.2386	6.4339	0.249167	1.18852
		3	17.8007	24.5299	6.72921	-0.0461465	0.96852
			17.6726	24.4532	6.78057	-0.0975072	0.934647
			17.6307	24.3496	6.71887	-0.0358033	0.975488
	miR-382-5p mimic	1	17.7356	21.1194	3.38378	3.29929	9.84428
			17.7053	21.0139	3.30862	3.37444	10.3707
			17.6227	21.1139	3.49112	3.19194	9.13841
		2	17.7606	20.971	3.21042	3.47264	11.1012
			17.8957	20.9525	3.05682	3.62625	12.3484
			17.5979	20.9479	3.35002	3.33305	10.0774
		3	17.6663	21.1249	3.45854	3.22453	9.34714
			17.5574	21.0027	3.44532	3.23775	9.43319
			17.472	21.0695	3.59756	3.0855	8.48846

## Sheet: Sheet1
miR-382-5p expression
mimic NC (A group)	1.004	0.884	0.861	1.172	1.065	1.189	0.969	0.935	0.975
miR-382-5p mimic (B group)	9.844	10.371	9.138	11.101	12.348	10.077	9.347	9.433	8.488
	Table Analyzed	Data 1
	Column A
	vs	vs
	Column B
	Unpaired t test
	P value	< 0.0001
	P value summary	***
	Are means signif. different? (P < 0.05)	Yes
	One- or two-tailed P value?	Two-tailed
	t, df	t=23.29 df=16
