# Supplementary material for: Has_circRNA_0122683 (circ-PRKCI) relieves ferroptosis of HPAEpiCs in sepsis-induced acute lung injury by sponging miR-382-5p
Source: PeerJ journal article supplement (doi:10.7717/peerj.19404), 2025-05-13
Supplement: Raw_data.zip [file Figure 6C Data.xlsx]

## Sheet: Sheet1
		Repeat 1			Repeat 2			Repeat 3			mean	Relative multiple change
A group	Renilla	6236	6181	6194	5724	6225	6580	5731	6742	6546
	Firefly	13395	14517	13159	14386	13431	14563	14235	14430	13422
	Renilla/Firefly	0.465547	0.425777	0.470704	0.397887	0.46348	0.45183	0.402599	0.467221	0.487707	0.448084	1
B group	Renilla	5075	6386	7083	6467	6040	4937	6309	5768	5895
	Firefly	13750	14018	13849	14615	13439	15355	12999	12898	15560
	Renilla/Firefly	0.369091	0.455557	0.511445	0.442491	0.449438	0.321524	0.485345	0.447201	0.378856	0.428994	0.957398
A group	basic plasmid+mimic NC
B group	basic plasmid+miR-382-5p mimic
	Table Analyzed	Data 1
	Column A
	vs	vs
	Column B
	Unpaired t test
	P value	0.4143
	P value summary	ns
	Are means signif. different? (P < 0.05)	No
	One- or two-tailed P value?	Two-tailed
	t, df	t=0.8381 df=16

## Sheet: Sheet2
		Repeat 1			Repeat 2			Repeat 3			mean	Relative multiple change
A group	Renilla	8321	8612	8259	9623	7667	8036	10199	9168	9374
	Firefly	31722	27666	28157	25755	28613	29431	30765	29095	31270
	Renilla/Firefly	0.26231	0.311285	0.29332	0.373636	0.267955	0.273045	0.331513	0.315106	0.299776	0.303105	1
B group	Renilla	3210	2114	3101	2989	3836	4103	3044	4159	3964
	Firefly	31754	28192	25737	26186	27992	27964	28413	27405	26572
	Renilla/Firefly	0.10109	0.0749858	0.120488	0.114145	0.137039	0.146724	0.107134	0.151761	0.14918	0.122505	0.404167
A group	wt-circ-PRKCI+mimic NC
B group	wt-circ-PRKCI+miR-382-5p mimic
		Table Analyzed	Data 1
		Column A
		vs	vs
		Column B
		Unpaired t test
		P value	< 0.0001
		P value summary	***
		Are means signif. different? (P < 0.05)	Yes
		One- or two-tailed P value?	Two-tailed
		t, df	t=12.39 df=16

## Sheet: Sheet3
		Repeat 1			Repeat 2			Repeat 3			mean	Relative multiple change
A group	Renilla	12988	14909	10685	11729	11706	15086	13680	14147	15834
	Firefly	23794	24888	24869	21869	24200	21601	21971	20657	23513
	Renilla/Firefly	0.545852	0.599044	0.429651	0.53633	0.483719	0.698394	0.622639	0.684853	0.673415	0.585988	1
B group	Renilla	11572	15094	15829	13034	11553	13396	8460	10697	14611
	Firefly	21699	21508	25759	22314	22981	25304	25213	25209	21938
	Renilla/Firefly	0.533296	0.701785	0.614504	0.584118	0.50272	0.529402	0.335541	0.424333	0.666013	0.543524	0.927533
A group	mut-circ-PRKCI+mimic NC
B group	mut-circ-PRKCI+miR-382-5p mimic
	Table Analyzed	Data 1
	Column A
	vs	vs
	Column B
	Unpaired t test
	P value	0.404
	P value summary	ns
	Are means signif. different? (P < 0.05)	No
	One- or two-tailed P value?	Two-tailed
	t, df	t=0.8572 df=16
