# Supplementary material for: Has_circRNA_0122683 (circ-PRKCI) relieves ferroptosis of HPAEpiCs in sepsis-induced acute lung injury by sponging miR-382-5p
Source: PeerJ journal article supplement (doi:10.7717/peerj.19404), 2025-05-13
Supplement: Raw_data.zip [file Figure 6D Data.xlsx]

## Sheet: RIP
Gene name		group	Ct	△Ct	2-△△Ct	%Input
RIP
circ-PRKCI		Dilution ratio	10
	Rep1	IgG	25.5528	7.99637	0.0039161	0.39161		Results
		Ago2	20.9964	3.43999	0.0921425	9.21425		%Input
		Input	20.8783	3.32193	0.1	10		Rep1	Rep2	Rep3	平均average
	Rep2	IgG	25.4939	8.15717	0.00350306	0.350306	IgG	0.39161	0.350306	0.367283	0.369733
		Ago2	20.9964	3.65964	0.0791296	7.91296	Ago2	9.21425	7.91296	9.47201	8.86641
		Input	20.6587	3.32193	0.1	10	Relative%Inptut	1	1	1	1
	Rep3	IgG	25.4479	8.08889	0.00367283	0.367283		23.5291	22.5887	25.7894	23.9691
		Ago2	20.7592	3.40019	0.0947201	9.47201
		Input	20.6809	3.32193	0.1	10
miR-382-5p	Rep1	IgG	25.5248	8.06986	0.00372161	0.372161		Results
		Ago2	20.8524	3.39752	0.0948949	9.48949		%Input
		Input	20.7768	3.32193	0.1	10		Rep1	Rep2	Rep3	平均average
	Rep2	IgG	25.5609	8.15299	0.00351322	0.351322	IgG	0.372161	0.351322	0.35945	0.360978
		Ago2	20.8783	3.47041	0.0902196	9.02196	Ago2	9.48949	9.02196	9.25637	9.25594
		Input	20.7299	3.32193	0.1	10	Relative%Inptut	1	1	1	1
	Rep3	IgG	25.479	8.11999	0.0035945	0.35945		25.4983	25.68	25.7515	25.6433
		Ago2	20.7924	3.43341	0.0925637	9.25637
		Input	20.6809	3.32193	0.1	10

## Sheet: Sheet1
circ-PRKCI expression					miR-382-5p expression
IgG (A group)	0.39161	0.350306	0.367283		IgG (A group)	0.372161	0.351322	0.35945
Ago2 (B group)	9.21425	7.91296	9.47201		Ago2 (B group)	9.48949	9.02196	9.25637
	Table Analyzed	Data 1				Table Analyzed	Data 1
	Column A					Column A
	vs	vs				vs	vs
	Column B					Column B
	Unpaired t test					Unpaired t test
	P value	< 0.0001				P value	< 0.0001
	P value summary	***				P value summary	***
	Are means signif. different? (P < 0.05)	Yes				Are means signif. different? (P < 0.05)	Yes
	One- or two-tailed P value?	Two-tailed				One- or two-tailed P value?	Two-tailed
	t, df	t=17.60 df=4				t, df	t=65.84 df=4
