# Supplementary material for: Has_circRNA_0122683 (circ-PRKCI) relieves ferroptosis of HPAEpiCs in sepsis-induced acute lung injury by sponging miR-382-5p
Source: PeerJ journal article supplement (doi:10.7717/peerj.19404), 2025-05-13
Supplement: Raw_data.zip [file Supplement Figure 1 data.xlsx]

## Sheet: miR
										Detection index	group	Mean internal parameter	Average target gene	ΔCt	—ΔΔCt	Relative expression level	SD
Gene name	group		U6	Target gene	ΔCt	—ΔΔCt	Relative expression level			miR-1324	circ-NC vector	17.4159	24.7976	7.38169	0	1	0.130555
miR-1324	circ-NC vector	1	17.6296	24.7292	7.0996	0.282085	1.21595				circ-PRKCI vector	17.4613	24.7892	7.3279	0.0537887	1.03799	0.138628
			17.4469	25.0029	7.55601	-0.174326	0.886181			miR-382-5p	circ-NC vector	17.3519	24.3978	7.04587	0	1	0.0981988
			17.4845	24.8469	7.36248	0.0192086	1.0134				circ-PRKCI vector	17.3245	25.7827	8.4582	-1.41234	0.375703	0.029535
		2	17.0809	24.7719	7.69103	-0.309346	0.807008			miR-890	circ-NC vector	17.4033	24.416	7.01279	0	1	0.149184
			17.4177	24.7572	7.33956	0.0421243	1.02963				circ-PRKCI vector	17.3638	24.2045	6.8407	0.17209	1.12669	0.1646
			17.4979	24.6575	7.15963	0.222055	1.16639
		3	17.4459	24.9139	7.46792	-0.0862343	0.941978
			17.2814	24.7513	7.4699	-0.088216	0.940685
			17.4586	24.7476	7.28904	0.0926499	1.06633
	circ-PRKCI vector	1	17.4049	24.6985	7.29358	0.0881072	1.06297
			17.4746	24.9061	7.43151	-0.0498266	0.966052
			17.3661	24.5207	7.15463	0.22706	1.17045
		2	17.5517	24.8479	7.29622	0.0854712	1.06103
			17.6584	24.9875	7.32911	0.0525811	1.03712
			17.4959	24.5949	7.09897	0.282721	1.21649
		3	17.4115	24.9475	7.53595	-0.154262	0.898592
			17.372	24.4921	7.12007	0.261613	1.19882
			17.416	25.1071	7.69105	-0.309367	0.806996
miR-382-5p	circ-NC vector	1	17.3078	24.5721	7.26435	-0.218484	0.859468
			17.3815	24.427	7.04556	0.000308415	1.00021
			17.2586	24.3483	7.08968	-0.0438171	0.970085
		2	17.4477	24.3041	6.85643	0.189435	1.14032
			17.3711	24.3283	6.95715	0.0887203	1.06343
			17.3991	24.2685	6.86948	0.176383	1.13005
		3	17.2054	24.4425	7.23709	-0.191223	0.875863
			17.416	24.4369	7.02085	0.0250139	1.01749
			17.3804	24.4526	7.0722	-0.0263361	0.981911
	circ-PRKCI vector	1	17.3121	25.7031	8.39094	-1.34508	0.393633
			17.4442	25.8055	8.36127	-1.3154	0.401813
			17.2836	25.8049	8.52125	-1.47538	0.359638
		2	17.3766	25.7035	8.32694	-1.28107	0.41149
			17.2772	25.7249	8.44776	-1.4019	0.378432
			17.3527	25.7088	8.35612	-1.31025	0.40325
		3	17.2662	25.9611	8.69485	-1.64898	0.318865
			17.3414	25.8773	8.53586	-1.48999	0.356015
			17.2666	25.7554	8.48884	-1.44297	0.367808
miR-890	circ-NC vector	1	17.4891	24.5761	7.08708	-0.0742836	0.949814
			17.3085	24.4681	7.15963	-0.146831	0.903232
			17.342	24.4797	7.13772	-0.124923	0.917053
		2	17.5098	24.2313	6.72155	0.291243	1.22369
			17.509	24.2939	6.78488	0.227911	1.17114
			17.5385	24.261	6.72258	0.290217	1.22282
		3	17.3395	24.4917	7.15217	-0.139371	0.907915
			17.324	24.4912	7.16727	-0.154478	0.898458
			17.269	24.4513	7.18228	-0.169484	0.88916
	circ-PRKCI vector	1	17.3408	24.1362	6.79547	0.217326	1.16258
			17.3838	24.1693	6.78551	0.227284	1.17063
			17.327	24.2395	6.91245	0.100348	1.07203
		2	17.4664	24.1356	6.66914	0.343653	1.26897
			17.5022	24.0448	6.5426	0.470198	1.3853
			17.5058	24.1448	6.63902	0.373779	1.29574
		3	17.2737	24.4897	7.21595	-0.203154	0.868649
			17.2226	24.2506	7.02803	-0.0152339	0.989496
			17.2517	24.2299	6.97819	0.0346085	1.02428

## Sheet: Sheet1
miR-1324 expression											miR-382-5p expression											miR-890 expression
circ-NC vector (A group)	1.216	0.886	1.013	0.807	1.03	1.166	0.942	0.941	1.066		circ-NC vector (A group)	0.859	1	0.97	1.14	1.063	1.13	0.876	1.017	0.982		circ-NC vector (A group)	0.95	0.903	0.917	1.224	1.171	1.223	0.908	0.898	0.889
circ-PRKCI vector (B group)	1.063	0.966	1.17	1.061	1.037	1.216	0.899	1.199	0.807		circ-PRKCI vector (B group)	0.394	0.402	0.36	0.411	0.378	0.403	0.319	0.356	0.368		circ-PRKCI vector (B group)	1.163	1.171	1.072	1.269	1.385	1.296	0.869	0.989	1.024
	Table Analyzed	Data 1										Table Analyzed	Data 1										Table Analyzed	Data 1
	Column A											Column A											Column A
	vs	vs										vs	vs										vs	vs
	Column B											Column B											Column B
	Unpaired t test											Unpaired t test											Unpaired t test
	P value	0.5473										P value	< 0.0001										P value	0.1024
	P value summary	ns										P value summary	***										P value summary	ns
	Are means signif. different? (P < 0.05)	No										Are means signif. different? (P < 0.05)	Yes										Are means signif. different? (P < 0.05)	No
	One- or two-tailed P value?	Two-tailed										One- or two-tailed P value?	Two-tailed										One- or two-tailed P value?	Two-tailed
	t, df	t=0.6149 df=16										t, df	t=18.37 df=16										t, df	t=1.732 df=16
