# Supplementary material for: Has_circRNA_0122683 (circ-PRKCI) relieves ferroptosis of HPAEpiCs in sepsis-induced acute lung injury by sponging miR-382-5p
Source: PeerJ journal article supplement (doi:10.7717/peerj.19404), 2025-05-13
Supplement: Raw_data.zip [file Supplement Figure 2A data.xlsx]

## Sheet: Sheet1
Absorbance value（450 nm）
	Repeat 1			Repeat 2			Repeat 3
A group	0.34	0.37	0.34	0.32	0.29	0.28	0.39	0.37	0.33
B group	0.67	0.59	0.55	0.66	0.55	0.52	0.61	0.59	0.54
C group	0.42	0.41	0.34	0.35	0.35	0.42	0.33	0.36	0.39
A group	LPS treated+circ-NC vector+mimic NC group
B group	LPS treated+circ-PRKCI vector+mimic NC group
C group	LPS treated+circ-PRKCI vector+miR-382-5p mimic group
	One-way analysis of variance
	P value	< 0.0001
	P value summary	***
	Are means signif. different? (P < 0.05)	Yes
	Number of groups	3
	F	90.76
	R squared	0.8832
	Tukey's Multiple Comparison Test	Mean Diff.	q	Significant? P < 0.05?	Summary	95% CI of diff
	Column A vs Column B	-0.25	17.67	Yes	***	-0.3000 to -0.2000
	Column A vs Column C	-0.03778	2.671	No	ns	-0.08774 to 0.01219
	Column B vs Column C	0.2122	15	Yes	***	0.1623 to 0.2622
