# Supplementary material for: Has_circRNA_0122683 (circ-PRKCI) relieves ferroptosis of HPAEpiCs in sepsis-induced acute lung injury by sponging miR-382-5p
Source: PeerJ journal article supplement (doi:10.7717/peerj.19404), 2025-05-13
Supplement: Raw_data.zip [file Supplement Figure 2B data.xlsx]

## Sheet: Sheet1
Fe 2+ concentration（nmol/ml）
	Repeat 1			Repeat 2			Repeat 3			mean	Relative multiple change
A group	444.15	486.42	431.48	457.35	482.84	442.95	460.59	478.55	478.02	462.483	1
B group	81.8	102.43	92.73	99.03	80.64	128.64	96.44	101.73	116.7	100.016	0.216258
C group	242.36	196.07	221.64	250.44	217.75	191.62	264.6	223.34	175.2	220.336	0.476418
A group	LPS treated+circ-NC vector+mimic NC group
B group	LPS treated+circ-PRKCI vector+mimic NC group
C group	LPS treated+circ-PRKCI vector+miR-382-5p mimic group
	One-way analysis of variance
	P value	< 0.0001
	P value summary	***
	Are means signif. different? (P < 0.05)	Yes
	Number of groups	3
	F	618.9
	R squared	0.981
	Tukey's Multiple Comparison Test	Mean Diff.	q	Significant? P < 0.05?	Summary	95% CI of diff
	Column A vs Column B	362.5	48.84	Yes	***	336.3 to 388.7
	Column A vs Column C	242.1	32.63	Yes	***	215.9 to 268.4
	Column B vs Column C	-120.3	16.21	Yes	***	-146.5 to -94.11
