# Supplementary material for: Has_circRNA_0122683 (circ-PRKCI) relieves ferroptosis of HPAEpiCs in sepsis-induced acute lung injury by sponging miR-382-5p
Source: PeerJ journal article supplement (doi:10.7717/peerj.19404), 2025-05-13
Supplement: Raw_data.zip [file Supplement Figure 2D data.xlsx]

## Sheet: Sheet1
ROS fluorescence intensity
	Repeat 1			Repeat 2			Repeat 3			mean	Relative multiple change
A group	3646	3250	3329	3446	3777	3253	3553	3920	3265	3493.22	1
B group	1595	1680	1241	1301	1465	1250	1437	1551	1380	1433.33	0.410318
C group	2001	1725	1799	1779	1860	1973	1864	2031	1683	1857.22	0.531664
A group	LPS treated+circ-NC vector+mimic NC group
B group	LPS treated+circ-PRKCI vector+mimic NC group
C group	LPS treated+circ-PRKCI vector+miR-382-5p mimic group
	One-way analysis of variance
	P value	< 0.0001
	P value summary	***
	Are means signif. different? (P < 0.05)	Yes
	Number of groups	3
	F	318.6
	R squared	0.9637
	Tukey's Multiple Comparison Test	Mean Diff.	q	Significant? P < 0.05?	Summary	95% CI of diff
	Column A vs Column B	2060	33.8	Yes	***	1845 to 2275
	Column A vs Column C	1636	26.85	Yes	***	1421 to 1851
	Column B vs Column C	-423.9	6.956	Yes	***	-639.1 to -208.6
