# Supplementary material for: Has_circRNA_0122683 (circ-PRKCI) relieves ferroptosis of HPAEpiCs in sepsis-induced acute lung injury by sponging miR-382-5p
Source: PeerJ journal article supplement (doi:10.7717/peerj.19404), 2025-05-13
Supplement: Raw_data.zip [file Supplement Figure 2E data.xlsx]

## Sheet: Sheet1
MDA concentration（nmol/ml）
	Repeat 1			Repeat 2			Repeat 3			mean	Relative multiple change
A group	138.11	162.23	157.37	166.5	153.29	164.36	141.26	148.39	162.66	154.908	1
B group	112.43	126.34	96.79	125.12	120.53	115.27	141.95	129.06	98.07	118.396	0.764297
C group	212.2	221.73	230.07	229.53	186.99	206.26	232.22	213.67	238.08	218.972	1.41357
A group	LPS treated+circ-NC vector+mimic NC group
B group	LPS treated+circ-PRKCI vector+mimic NC group
C group	LPS treated+circ-PRKCI vector+miR-382-5p mimic group
	One-way analysis of variance
	P value	< 0.0001
	P value summary	***
	Are means signif. different? (P < 0.05)	Yes
	Number of groups	3
	F	121.6
	R squared	0.9102
	Tukey's Multiple Comparison Test	Mean Diff.	q	Significant? P < 0.05?	Summary	95% CI of diff
	Column A vs Column B	36.51	7.908	Yes	***	20.20 to 52.82
	Column A vs Column C	-64.06	13.87	Yes	***	-80.37 to -47.76
	Column B vs Column C	-100.6	21.78	Yes	***	-116.9 to -84.27
