# Supplementary material for: Has_circRNA_0122683 (circ-PRKCI) relieves ferroptosis of HPAEpiCs in sepsis-induced acute lung injury by sponging miR-382-5p
Source: PeerJ journal article supplement (doi:10.7717/peerj.19404), 2025-05-13
Supplement: Raw_data.zip [file Supplement Figure 2F data.xlsx]

## Sheet: Sheet1
GSH concentration（nmol/ml）
	Repeat 1			Repeat 2			Repeat 3			mean	Relative multiple change
A group	15.64	12.59	16.23	14.23	16.39	13.92	16.35	17.17	14.65	15.2411	1
B group	126.52	104.51	93.57	122.88	106.33	83.93	96.36	117.07	86.35	104.169	6.83473
C group	73.19	86.11	85.63	92.76	75.64	84.22	66.51	96.52	82.99	82.6189	5.42079
A group	LPS treated+circ-NC vector+mimic NC group
B group	LPS treated+circ-PRKCI vector+mimic NC group
C group	LPS treated+circ-PRKCI vector+miR-382-5p mimic group
	One-way analysis of variance
	P value	< 0.0001
	P value summary	***
	Are means signif. different? (P < 0.05)	Yes
	Number of groups	3
	F	175
	R squared	0.9358
	Tukey's Multiple Comparison Test	Mean Diff.	q	Significant? P < 0.05?	Summary	95% CI of diff
	Column A vs Column B	-88.93	25.36	Yes	***	-101.3 to -76.54
	Column A vs Column C	-67.38	19.21	Yes	***	-79.76 to -54.99
	Column B vs Column C	21.55	6.145	Yes	***	9.165 to 33.94
