# Supplementary material for: Has_circRNA_0122683 (circ-PRKCI) relieves ferroptosis of HPAEpiCs in sepsis-induced acute lung injury by sponging miR-382-5p
Source: PeerJ journal article supplement (doi:10.7717/peerj.19404), 2025-05-13
Supplement: Raw_data.zip [file Supplement Figure 2G data.xlsx]

## Sheet: Sheet1
IL-6（ng/ml）
	Repeat 1)			Repeat 2			Repeat 3
A group	0.63	0.61	0.65	0.73	0.77	0.73	0.72	0.56	0.67
B group	0.28	0.22	0.23	0.31	0.32	0.37	0.25	0.22	0.29
C group	0.53	0.68	0.58	0.52	0.49	0.41	0.55	0.61	0.53
A group	LPS treated+circ-NC vector+mimic NC group
B group	LPS treated+circ-PRKCI vector+mimic NC group
C group	LPS treated+circ-PRKCI vector+miR-382-5p mimic group
	One-way analysis of variance
	P value	< 0.0001
	P value summary	***
	Are means signif. different? (P < 0.05)	Yes
	Number of groups	3
	F	85.08
	R squared	0.8764
	Tukey's Multiple Comparison Test	Mean Diff.	q	Significant? P < 0.05?	Summary	95% CI of diff
	Column A vs Column B	0.3978	18.09	Yes	***	0.3201 to 0.4754
	Column A vs Column C	0.13	5.912	Yes	***	0.05233 to 0.2077
	Column B vs Column C	-0.2678	12.18	Yes	***	-0.3454 to -0.1901

## Sheet: Sheet2
IL-1β（ng/ml）
	Repeat 1			Repeat 2			Repeat 3
A group	0.29	0.26	0.33	0.29	0.31	0.35	0.35	0.29	0.24
B group	0.24	0.21	0.18	0.23	0.19	0.27	0.24	0.17	0.24
C group	0.75	0.91	0.78	0.68	0.79	0.79	0.83	0.81	0.72
A group	LPS treated+circ-NC vector+mimic NC group
B group	LPS treated+circ-PRKCI vector+mimic NC group
C group	LPS treated+circ-PRKCI vector+miR-382-5p mimic group
	One-way analysis of variance
	P value	< 0.0001
	P value summary	***
	Are means signif. different? (P < 0.05)	Yes
	Number of groups	3
	F	365.4
	R squared	0.9682
	Tukey's Multiple Comparison Test	Mean Diff.	q	Significant? P < 0.05?	Summary	95% CI of diff
	Column A vs Column B	0.08222	5.143	Yes	**	0.02576 to 0.1387
	Column A vs Column C	-0.4833	30.23	Yes	***	-0.5398 to -0.4269
	Column B vs Column C	-0.5656	35.38	Yes	***	-0.6220 to -0.5091

## Sheet: Sheet3
TNF-α（ng/ml）
	Repeat 1			Repeat 2			Repeat 3
A group	1.27	1.44	1.22	1.35	1.22	1.18	1.27	1.26	1.37
B group	0.58	0.62	0.61	0.58	0.66	0.88	0.62	0.74	0.68
C group	0.81	0.87	0.77	0.79	0.96	0.68	0.9	0.87	1.04
A group	LPS treated+circ-NC vector+mimic NC group
B group	LPS treated+circ-PRKCI vector+mimic NC group
C group	LPS treated+circ-PRKCI vector+miR-382-5p mimic group
	One-way analysis of variance
	P value	< 0.0001
	P value summary	***
	Are means signif. different? (P < 0.05)	Yes
	Number of groups	3
	F	99.48
	R squared	0.8924
	Tukey's Multiple Comparison Test	Mean Diff.	q	Significant? P < 0.05?	Summary	95% CI of diff
	Column A vs Column B	0.6233	19.47	Yes	***	0.5102 to 0.7364
	Column A vs Column C	0.4322	13.5	Yes	***	0.3191 to 0.5453
	Column B vs Column C	-0.1911	5.969	Yes	***	-0.3042 to -0.07803
