# Supplementary material for: Has_circRNA_0122683 (circ-PRKCI) relieves ferroptosis of HPAEpiCs in sepsis-induced acute lung injury by sponging miR-382-5p
Source: PeerJ journal article supplement (doi:10.7717/peerj.19404), 2025-05-13
Supplement: TableS1.docx [file TableS1.docx]

Supplementary Table 1. Primer sequences for qRT-PCR

| Genes | Primer sequences |
| --- | --- |
| circ-PRKCI | Forward: 5’-AATGAACCTGTCCAGCTCACT-3’ |
|  | Reverse: 5’-TCTGGTCAGGGTTATCGGAG-3’ |
| PRKCI | Forward: 5’-AGGTCCGGGTGAAAGCCTA-3’ |
|  | Reverse: 5’-TGAAGAGCTGTTCGTTGTCAAA-3’ |
| miR-1324 | Forward: 5’-CCAGACAGAATTCTATGCACTTTC-3’ |
| miR-382-5p | Forward: 5’-GAAGTTGTTCGTGGTGGATTCG-3’ |
| miR-890 | Forward: 5’-TACTTGGAAAGGCATCAGTTG-3’ |
|  | Universal Reverse for all miRNAs: provided by the miScript SYBR Green PCR Kit |
| U6 | Forward: 5’-CTCGCTTCGGCAGCACA-3’ |
|  | Reverse: 5’-AACGCTTCACGAATTTGCGT-3’ |
| GAPDH | Forward: 5’-GCACCGTCAAGGCTGAGAAC-3’ |
|  | Reverse: 5’-ATGGTGGTGAAGACGCCAGT-3’ |

qRT-PCR: quantitative real-time PCR, circ: circular RNA, PRKCI: protein kinase C iota, miR: microRNA, U6: U6 small nuclear RNA, GAPDH: glyceraldehyde-3-phosphate dehydrogenase
